# Supplementary material for: The role of organisational and cultural factors in the implementation of system-wide interventions in acute hospitals to improve patient outcomes: protocol for a systematic literature review
Source: PubMed Central journal article supplement — BMJ Open. 2013 Mar 9;3(3):e002268. doi: 10.1136/bmjopen-2012-002268 (PMC3612761; doi:10.1136/bmjopen-2012-002268), 2013-03-09
Supplement: bmjopen-2012-002268.draft_revisions.pdf [file bmjopen-2012-002268.draft_revisions.pdf]

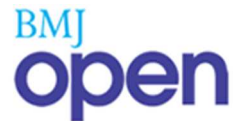

**The role of organisational and cultural factors in the implementation of system-wide interventions in acute hospitals to improve patient outcomes: protocol for a systematic literature review**

|                                 |                                                                                                                                                                                                                                                                                                                                                                                                                                                                                   |
|---------------------------------|-----------------------------------------------------------------------------------------------------------------------------------------------------------------------------------------------------------------------------------------------------------------------------------------------------------------------------------------------------------------------------------------------------------------------------------------------------------------------------------|
| Journal:                        | <i>BMJ Open</i>                                                                                                                                                                                                                                                                                                                                                                                                                                                                   |
| Manuscript ID:                  | bmjopen-2012-002268                                                                                                                                                                                                                                                                                                                                                                                                                                                               |
| Article Type:                   | Protocol                                                                                                                                                                                                                                                                                                                                                                                                                                                                          |
| Date Submitted by the Author:   | 26-Oct-2012                                                                                                                                                                                                                                                                                                                                                                                                                                                                       |
| Complete List of Authors:       | Nosrati, Hadis; The Simpson Centre for Health Services Research, University of New South Wales<br>Clay-Williams, Robyn; Centre for Clinical Governance Research, University of New South Wales<br>Cunningham, Frances; University of NSW, Centre for Clinical Governance Research<br>Hillman, Ken; The Simpson Centre for Health Services Research, University of New South Wales<br>Braithwaite, Jeffrey; Centre for Clinical Governance Research, University of New South Wales |
| <b>Primary Subject Heading</b>: | Health services research                                                                                                                                                                                                                                                                                                                                                                                                                                                          |
| Secondary Subject Heading:      | Evidence based practice                                                                                                                                                                                                                                                                                                                                                                                                                                                           |
| Keywords:                       | health service research, Performance measures, Healthcare quality improvement                                                                                                                                                                                                                                                                                                                                                                                                     |
|                                 |                                                                                                                                                                                                                                                                                                                                                                                                                                                                                   |

SCHOLARONE™  
Manuscripts

**The role of organisational and cultural factors in the implementation of system-wide interventions in acute hospitals to improve patient outcomes: a systematic literature review**

**Authors:**

|                                                                        |
|------------------------------------------------------------------------|
| <b>Hadis Nosrati, PhD</b><br>Research Fellow <sup>1</sup>              |
| <b>Robyn Clay-Williams, PhD</b><br>Research Fellow <sup>2</sup>        |
| <b>Frances Cunningham, ScD</b><br>Senior Research Fellow <sup>2</sup>  |
| <b>Ken Hillman,</b><br>Professor and Director <sup>1</sup>             |
| <b>Jeffrey Braithwaite, PhD</b><br>Professor and Director <sup>2</sup> |

**Affiliations:**

1 The Simpson Centre for Health Services Research  
Australian Institute of Health Innovation  
University of New South Wales  
Sydney, Australia  
2 Centre for Clinical Governance Research  
Australian Institute of Health Innovation  
University of New South Wales  
Sydney, Australia

**Contact details of corresponding author:**

|                                                                                                                                                 |
|-------------------------------------------------------------------------------------------------------------------------------------------------|
| <b>Dr Hadis Nosrati</b>                                                                                                                         |
| <b>Business:</b> + 612 9385 8987                                                                                                                |
| <b>Fax:</b> + 612 9663 8692                                                                                                                     |
| <b>Mobile:</b> + 61405 996330                                                                                                                   |
| <b>Email:</b> hadis@unsw.edu.au                                                                                                                 |
| <b>Address:</b> Australian Institute of Health Innovation<br>Faculty of Medicine<br>University of New South Wales<br>Sydney NSW 2052, Australia |

**Keywords:**

Organisational culture, hospital-wide intervention, patient outcomes, acute care hospitals

**Manuscript data:**

**Words in abstract:** 300  
**Words in body:** 1358  
**Tables:** 0  
**Figures:** 1  
**References:** 17

**Statements:**

**Funding:** This research is supported under the NSW Department of Health Capacity Building Infrastructure Program, Projects scheme (project RG093684) and National Health and Medical Research Council (NHMRC) program grant 568612.

**Conflict of interest:** The authors have no conflict of interest to declare.

**Contributorship:** All authors contributed to the design, drafting and revision of the paper, and approved the final version to be published.

**Data sharing:** Data available on request from the corresponding author.

1  
2  
3 **The role of organisational and cultural factors in the implementation of system-wide**  
4 **interventions in acute hospitals to improve patient outcomes: a systematic literature review**  
5  
6  
7

8 **ABSTRACT**  
9

10  
11 **Introduction:** To reduce preventable adverse events, there is keen interest in more sustained  
12 progress in improving patient safety. However, little is known about the role of organisational  
13 culture in the success and sustainability of the hospital-wide interventions, and how local culture  
14 affects patient outcomes in acute hospitals.  
15  
16  
17  
18  
19

20  
21 **Methods and analysis:** A systematic literature review will be conducted to identify  
22 organisational factors influencing hospital-wide interventions and patient outcomes. A search of  
23 English language articles will be performed in MEDLINE, CINAHL, EMBASE, Web of  
24 Science, PsychInfo and Global Health databases using Medical Subject Headings and keywords.  
25  
26  
27  
28  
29  
30  
31  
32  
33  
34  
35  
36  
37  
38  
39  
40  
41  
42  
43  
44  
45  
46  
47  
48  
49  
50  
51  
52  
53  
54  
55  
56  
57  
58  
59  
60

JAMA, BMJ, BMJ Quality and Safety, New England Journal of Medicine and Implementation Science will be hand searched for the last five years. The ‘grey literature’ will be excluded. Randomised controlled trials, quasi-randomised trials, controlled before and after design studies and interrupted time-series analysis studies will be included. Two reviewers independently will undertake a title and abstract review using inclusion and exclusion criteria. Studies will be excluded only after discussion between at least two reviewers, who will assess and agree on the inclusion, risk of bias and quality rating of the studies. One author will extract summary descriptive data from these studies; the second author will review this documentation for accuracy and completeness. It is likely that the studies will be heterogeneous in nature and so a narrative synthesis of the findings will be conducted. We will discuss characteristics of the studies and stratify the results according to the type of hospital-wide interventions, organisational factors associated with them and outcomes measured.

1  
2  
3  
4  
5  
6  
7  
8  
9  
10  
11  
12  
13  
14  
15  
16  
17  
18  
19  
20  
21  
22  
23  
24  
25  
26  
27  
28  
29  
30  
31  
32  
33  
34  
35  
36  
37  
38  
39  
40  
41  
42  
43  
44  
45  
46  
47  
48  
49  
50  
51  
52  
53  
54  
55  
56  
57  
58  
59  
60

**Ethics and dissemination:** The findings of this systematic literature review will be reported via peer-reviewed publications, conference and seminar presentations. The PRISMA checklist will be applied. No ethics approval is considered indicated, as this is a literature review only.

For peer review only

## ARTICLE SUMMARY

### Article focus

- This review aims to identify the organisational factors that affect the implementation of hospital-wide interventions in acute hospitals, and how these organisational factors and hospital-wide interventions influence patient outcomes.

### Key messages

- Silos, or vertical structures within hospitals such as wards, units, and departments, are well developed in acute care hospitals, but the system may fail at the intersection between silos for patients with complications of the original illness, which are outside the expertise of the admitting clinician.
- To bridge these intersections and thereby reduce the potential preventable adverse events for an increasingly aged and ill hospital population with comorbidities, organisation-wide patient safety interventions are becoming a major focus of health care delivery.
- Little is known about the cultural and organisational determinants of hospital-wide interventions and their effects on patient outcomes.

### Strengths and limitations of this project

- This study aims to increase our knowledge of organisational culture, which we believe is an important element in the success or failure of the implementation of hospital-wide interventions.
- We will investigate how the adoption of a system-wide intervention can affect patient outcomes.

- We will be including observational studies as well as controlled before and after studies in the systematic review, as it is likely they will provide valuable information.
- We include only English language studies.
- Risk of bias may occur by inclusion of non-randomised studies, but we will mitigate this risk by only accepting papers with high quality evidence and validated data.

For peer review only

## INTRODUCTION

Despite the remarkable advances in healthcare delivery and considerable changes in hospital patient populations and expectations associated with modern medicine, the fundamental organisation of hospitals has changed little into the twenty first century. The system is constructed around the admitting doctor and patient relationship.<sup>1</sup> In acute hospitals, wards are able to manage the day-to-day aspects of a patient's condition, but the system can fail when the patient's condition deteriorates and the admitting doctor no longer has the skills or knowledge to neither recognise nor manage the deteriorating patient.<sup>1-3</sup> One of the first organisation wide and patient centred systems, known as the Medical Emergency Team (MET) or Rapid Response System (RRS) has been implemented in many hospitals around the world to address this situation.<sup>4 5</sup> When the criteria that define an at-risk or deteriorating patient are met, a team of clinicians with appropriate skills urgently responds to the patient. However, because of the nature of hospitals, and depending on the existence of necessary infrastructure to provide the continuity of care,<sup>2</sup> the effectiveness of the few-implemented hospital-wide interventions, such as an RRS, varies significantly from one health organisation to another.<sup>6</sup> While there is keen interest in how to optimise and implement the system, little is known about the role of organisational culture<sup>7-10</sup> in the success and sustainability of the hospital-wide interventions, and how the culture could affect patient outcomes in acute hospitals. Patient safety interventions working at an organisational level that include participative principles, such as the involvement of workers in design and implementation, may provide the greatest hope of improving patient safety.<sup>11-13</sup> This protocol details the processes of a systematic literature review that aims to identify the organisational and cultural factors<sup>10 14</sup> affecting the adoption and success of hospital-wide interventions in acute hospitals, and to assess the effects of those factors on patient

1  
2  
3 outcomes.

## 4 5 **METHODS AND ANALYSIS**

### 6 7 8 **Search Strategy**

9  
10  
11 We will search MEDLINE, CINAHL, EMBASE, Web of Science, PsychInfo, Global Health,  
12 using Medical Subject Headings and keywords, from 1946, 1991, 1947, 1934, 1967, 1910,  
13 respectively to September 2012. The general search strategy is shown in Box 1 and the subject  
14 heading will be adjusted for each database. We will use multiple terms to identify culture and  
15 intervention. We will restrict the search to English language articles and we will hand search the  
16 journals, JAMA, BMJ, BMJ Quality and Safety, New England Journal of Medicine and  
17 Implementation Science, separately for the last five years (from 2007-2012). We will also hand  
18 search the reference lists of the relevant Cochrane systematic reviews.

#### 19 20 21 **Box 1. General search strategy**

- |                                                                                                                                                                                                                                        |                                                                                                                                                                                                                                                                                                                                                                                                                                                                                                                                                                                                                                            |
|----------------------------------------------------------------------------------------------------------------------------------------------------------------------------------------------------------------------------------------|--------------------------------------------------------------------------------------------------------------------------------------------------------------------------------------------------------------------------------------------------------------------------------------------------------------------------------------------------------------------------------------------------------------------------------------------------------------------------------------------------------------------------------------------------------------------------------------------------------------------------------------------|
| 22<br>23<br>24<br>25<br>26<br>27<br>28<br>29<br>30<br>31<br>32<br>33<br>34<br>35<br>36<br>37<br>38<br>39<br>40<br>41<br>42<br>43<br>44<br>45<br>46<br>47<br>48<br>49<br>50<br>51<br>52<br>53<br>54<br>55<br>56<br>57<br>58<br>59<br>60 | <ol style="list-style-type: none"><li>1. Organisational culture OR organisational climate OR organisational context OR organisational characteristics OR workplace culture OR organisational goal OR organisational value</li><li>2. AND [(adopting organisation) OR (adherence to protocol) OR (organisational innovation) OR (diffusion of innovation) OR (intervention) OR (diffusion) OR (organisational change) OR (protocol change) OR (practice change) OR (structure change) OR (adoption) OR (leadership)]</li><li>3. AND (patient outcome)</li><li>4. AND [healthcare organisation OR hospital OR healthcare facility]</li></ol> |
|----------------------------------------------------------------------------------------------------------------------------------------------------------------------------------------------------------------------------------------|--------------------------------------------------------------------------------------------------------------------------------------------------------------------------------------------------------------------------------------------------------------------------------------------------------------------------------------------------------------------------------------------------------------------------------------------------------------------------------------------------------------------------------------------------------------------------------------------------------------------------------------------|

#### 59 60 **Study Selection and exclusion criteria**

Under the review's inclusion and exclusion criteria, research must focus on a hospital-wide intervention, i.e., mere implementation in the operation theatre, a few general units or ICU is not sufficient. Other inclusion criteria include investigating the organisational factors that may affect



1  
2  
3 the implementation. Studies should also provide patient outcome data before and after the  
4 hospital-wide intervention. The review will only include interventions in an acute care setting,  
5 i.e., rehabilitation centres, primary health cares, ambulatory services, and psychiatric facilities  
6 will be excluded. Other inclusion criteria include that the study report on empirical research, in  
7 peer reviewed, English language, scholarly journals, and that abstract and full text are available.  
8 Therefore, we will not include 'grey literature'.  
9  
10  
11  
12  
13  
14  
15  
16  
17

18 We will not limit our search to randomised controlled trial studies, since we believe  
19 observational studies and controlled before and after studies -- with validated data about patient  
20 outcomes -- can provide useful information to identify the organisational and cultural  
21 determinants of hospital-wide interventions.  
22  
23  
24  
25  
26  
27

28 References identified in the search will be reviewed for inclusion by two researchers. Studies  
29 will be excluded only after discussion between at least two reviewers, who will assess and agree  
30 on the inclusion and quality rating of the studies. All papers excluded by consensus will be  
31 depicted in a document explaining reason for exclusion. This process will be conducted  
32 according to the Preferred Reporting Items for Systematic Reviews and Meta-Analyses  
33 (PRISMA) guidelines<sup>15 16</sup> and literature selection will be presented in a PRISMA flow chart.<sup>15</sup>  
34  
35  
36  
37  
38  
39  
40  
41  
42

### 43 **Participants**

44  
45  
46 Participating hospitals may include any acute care facility, including metropolitan or rural, and  
47 private or public hospitals.  
48  
49  
50

### 51 **Type of interventions**

1  
2  
3 As noted, we will only include interventions that are hospital-wide and are associated with  
4 patient outcomes through validated data collected before and after implementation of the  
5 intervention. Also, the organisational elements of the intervention should have been explained in  
6 the study to make it qualified for our review.  
7  
8  
9  
10  
11

### 12 13 **Comparisons**

14  
15 Comparisons may include acute hospitals with similar nursing-patient ratio, size and region with  
16 no intervention.  
17  
18  
19  
20

### 21 22 **Types of outcome measures**

23  
24 Patient outcomes may include mortality rate, the rate of adverse events, patient satisfaction, and  
25 infection rate.  
26  
27  
28  
29

### 30 31 **Assessment of risk of bias**

32  
33 Two reviewers will independently assess risk of bias in eligible studies as outlined in the  
34 Cochrane Handbook for Systematic Reviews:<sup>17</sup> selective outcome reporting, and blinding of the  
35 research personnel to data collection and analysis. For any non-randomised trials included in the  
36 review, the authors will assess any selection bias that may lead to confounding of the outcome.  
37  
38 Disagreement regarding assessment of risk of bias will be resolved through discussion between  
39 two reviewers. If consensus is not reached, a third reviewer will be consulted.  
40  
41  
42  
43  
44  
45  
46  
47  
48

### 49 50 **Data Collection and Analysis**

51  
52 Using a standard form, one author will abstract summary descriptive data from these studies. The  
53 same author will compile a tabular presentation the study participants and setting, objective,  
54 design and method, type of hospital-wide intervention, organisational/cultural factors,  
55  
56  
57  
58  
59  
60

1  
2  
3 patient/process outcomes, and findings. The second author will independently review this  
4  
5 documentation for accuracy and completeness.  
6  
7

### 8 9 **Strategy for data synthesis**

10  
11 It is likely that included studies will be heterogeneous in nature and so we will conduct a  
12  
13 narrative synthesis of the findings. We will discuss characteristics of the studies and stratify the  
14  
15 results according to the type of hospital-wide interventions, organisational factors associated with  
16  
17 them, and outcomes measured. We anticipate that we will not be able to use a quality assessment  
18  
19 tool to formally assess the quality of the studies due to their heterogeneous nature.  
20  
21  
22

### 23 24 25 **ETHICS AND DISSEMINATION**

26  
27  
28 Ethics is not required given the protocol is a systematic literature review. The findings of this  
29  
30 review will be disseminated through mechanisms including peer-reviewed publications and  
31  
32 conference presentations. The PRISMA checklist<sup>15</sup> will be used for writing the final review.  
33  
34

35  
36 **ACKNOWLEDGEMENTS:** We acknowledge Dr. Isla Hains from the Centre for Health  
37  
38 Systems and Safety Research in the Australian Institute of Health Innovation who provided  
39  
40 guidance regarding the search strategy.  
41  
42

43  
44 **COMPETING INTERESTS:** The authors have no conflict of interest to declare.  
45  
46

47  
48 **AUTHORS' CONTRIBUTIONS:** All authors contributed to the design, drafting and revision  
49  
50 of the paper, and approved the final version to be published.  
51  
52  
53  
54  
55  
56  
57  
58  
59  
60

## REFERENCES

1. Hillman K, Chen J, Young L. The Evolution of the Health Care System. In: DeVita MA, Hillman K, Bellomo R, editors. *Medical Emergency Teams*: Springer New York, 2006:18-23.
2. Hillman K, Chen J, Aneman A. Continuum of hospital care: the role of intensive care. *Curr Opin Crit Care* 2010;16(5):505-09.
3. Hillman KM. Restructuring hospital services. *Med J Australia* 1998;169(5):239-39.
4. Hillman K, Parr M, Flabouris A, Bishop G, Stewart A. Redefining in-hospital resuscitation: the concept of the medical emergency team. *Resuscitation* 2001;48(2):105-10.
5. Sakai T, Devita MA. Rapid response system. *Journal of anesthesia* 2009;23(3):403-8.
6. Hillman K, Chen J, Cretikos M, Bellomo R, Brown D, Doig G, et al. Introduction of the medical emergency team (MET) system: a cluster-randomised controlled trial. *Lancet* 2005;365(9477):2091-7.
7. Braithwaite J. A lasting legacy from Tony Blair? NHS culture change. *JRSM* 2011;104(2):87-89.
8. Braithwaite J, Hyde P, Pope C. *Culture and climate in health care organizations*: Palgrave Macmillan, 2010.
9. Mannion R, Davies H, Harrison S, Konteh F, Greener I, McDonald R. Quantitative explorations of culture and performance relationship. *Changing organisational cultures and hospital performance in the NHS*. Birmingham, England: National Institute for Health Research, Service Delivery and Organisation Programme, 2010:42-72.
10. Mannion R, Davis H, Harrison S, Frederick K, Jacobs R, Walshe K. Changing Management Cultures in the English National Health Service. In: Braithwaite J, Hyde P, Pope C, editors. *Culture and Climate in Health Care Organisations*: palgrave macmillan, 2010:19-30.
11. Grayson ML, Russo PL, Crulckshank M, Bear JL, Gee CA, Hughes CF, et al. Outcomes from the first 2 years of the Australian National Hand Hygiene Initiative. *Med J Australia* 2011;195(10):615-19.
12. Larson EL, Early E, Cloonan P, Sugrue S, Parides M. An organizational climate intervention associated with increased handwashing and decreased nosocomial infections. *Behav Med* 2000;26(1):14-22.
13. Braithwaite J, Coiera E. Beyond patient safety Flatland. *Journal of the Royal Society of Medicine* 2010;103(6):219-25.
14. Cameron KS, Freeman SJ. Cultural congruence, strength, and type: Relationships to effectiveness. *Research in organizational change and development* 1991;5(1):23-58.

1  
2  
3 15. Liberati A, Altman DG, Tetzlaff J, Mulrow C, Gotzsche PC, Ioannidis JP, et al. The  
4 PRISMA statement for reporting systematic reviews and meta-analyses of studies that evaluate  
5 healthcare interventions: explanation and elaboration. *BMJ* 2009;339:b2700.  
6

7  
8 16. Moher D, Liberati A, Tetzlaff J, Altman DG. Preferred reporting items for systematic  
9 reviews and meta-analyses: the PRISMA statement. *BMJ* 2009;339:b2535.  
10

11 17. Higgins J, Green S, Editors. Cochrane Handbook for Systematic Reviews of Interventions.  
12 *The Cochrane Library* 2005(3).  
13  
14  
15  
16  
17  
18  
19  
20  
21  
22  
23  
24  
25  
26  
27  
28  
29  
30  
31  
32  
33  
34  
35  
36  
37  
38  
39  
40  
41  
42  
43  
44  
45  
46  
47  
48  
49  
50  
51  
52  
53  
54  
55  
56  
57  
58  
59  
60



**The role of organisational and cultural factors in the implementation of system-wide interventions in acute hospitals to improve patient outcomes: protocol for a systematic literature review**

|                                 |                                                                                                                                                                                                                                                                                                                                                                                                                                                                                   |
|---------------------------------|-----------------------------------------------------------------------------------------------------------------------------------------------------------------------------------------------------------------------------------------------------------------------------------------------------------------------------------------------------------------------------------------------------------------------------------------------------------------------------------|
| Journal:                        | <i>BMJ Open</i>                                                                                                                                                                                                                                                                                                                                                                                                                                                                   |
| Manuscript ID:                  | bmjopen-2012-002268.R1                                                                                                                                                                                                                                                                                                                                                                                                                                                            |
| Article Type:                   | Protocol                                                                                                                                                                                                                                                                                                                                                                                                                                                                          |
| Date Submitted by the Author:   | 17-Jan-2013                                                                                                                                                                                                                                                                                                                                                                                                                                                                       |
| Complete List of Authors:       | Nosrati, Hadis; The Simpson Centre for Health Services Research, University of New South Wales<br>Clay-Williams, Robyn; Centre for Clinical Governance Research, University of New South Wales<br>Cunningham, Frances; University of NSW, Centre for Clinical Governance Research<br>Hillman, Ken; The Simpson Centre for Health Services Research, University of New South Wales<br>Braithwaite, Jeffrey; Centre for Clinical Governance Research, University of New South Wales |
| <b>Primary Subject Heading</b>: | Health services research                                                                                                                                                                                                                                                                                                                                                                                                                                                          |
| Secondary Subject Heading:      | Evidence based practice                                                                                                                                                                                                                                                                                                                                                                                                                                                           |
| Keywords:                       | health service research, Performance measures, Healthcare quality improvement                                                                                                                                                                                                                                                                                                                                                                                                     |
|                                 |                                                                                                                                                                                                                                                                                                                                                                                                                                                                                   |

SCHOLARONE™  
Manuscripts

1  
2  
3  
4  
5  
6  
7  
8  
9  
10  
11  
12  
13  
14  
15  
16  
17  
18  
19  
20  
21  
22  
23  
24  
25  
26  
27  
28  
29  
30  
31  
32  
33  
34  
35  
36  
37  
38  
39  
40  
41  
42  
43  
44  
45  
46  
47  
48  
49  
50  
51  
52  
53  
54  
55  
56  
57  
58  
59  
60

## The role of organisational and cultural factors in the implementation of system-wide interventions in acute hospitals to improve patient outcomes: a systematic literature review

**Authors:**

|                                                                        |
|------------------------------------------------------------------------|
| <b>Hadis Nosrati, PhD</b><br>Research Fellow <sup>1</sup>              |
| <b>Robyn Clay-Williams, PhD</b><br>Research Fellow <sup>2</sup>        |
| <b>Frances Cunningham, ScD</b><br>Senior Research Fellow <sup>2</sup>  |
| <b>Ken Hillman,</b><br>Professor and Director <sup>1</sup>             |
| <b>Jeffrey Braithwaite, PhD</b><br>Professor and Director <sup>2</sup> |

**Affiliations:**

|                                                                                                                                                      |
|------------------------------------------------------------------------------------------------------------------------------------------------------|
| 1 The Simpson Centre for Health Services Research<br>Australian Institute of Health Innovation<br>University of New South Wales<br>Sydney, Australia |
| 2 Centre for Clinical Governance Research<br>Australian Institute of Health Innovation<br>University of New South Wales<br>Sydney, Australia         |

**Contact details of corresponding author:**

|                                                                                                                                                 |
|-------------------------------------------------------------------------------------------------------------------------------------------------|
| <b>Dr Robyn Clay-Williams</b>                                                                                                                   |
| <b>Business:</b> + 614 2158 2638                                                                                                                |
| <b>Fax:</b> + 612 9663 8692                                                                                                                     |
| <b>Mobile:</b> + 614 2158 2638                                                                                                                  |
| <b>Email:</b> r.clay-williams@unsw.edu.au                                                                                                       |
| <b>Address:</b> Australian Institute of Health Innovation<br>Faculty of Medicine<br>University of New South Wales<br>Sydney NSW 2052, Australia |

**Keywords:**

|                                                                                            |
|--------------------------------------------------------------------------------------------|
| Organisational culture, hospital-wide intervention, patient outcomes, acute care hospitals |
|--------------------------------------------------------------------------------------------|

**Manuscript data:**

|                               |
|-------------------------------|
| <b>Words in abstract:</b> 300 |
| <b>Words in body:</b> 1287    |
| <b>Tables:</b> 0              |
| <b>Figures:</b> 1             |
| <b>References:</b> 18         |

**Statements:**

|                                                                                                                                                                                                                                           |
|-------------------------------------------------------------------------------------------------------------------------------------------------------------------------------------------------------------------------------------------|
| <b>Funding:</b> This research is supported under the NSW Department of Health Capacity Building Infrastructure Program, Projects scheme (project RG093684) and National Health and Medical Research Council (NHMRC) program grant 568612. |
| <b>Conflict of interest:</b> The authors have no conflict of interest to declare.                                                                                                                                                         |
| <b>Contributorship:</b> All authors contributed to the design, drafting and revision of the paper, and approved the final version to be published.                                                                                        |
| <b>Data sharing:</b> Data available on request from the corresponding author.                                                                                                                                                             |

1  
2  
3 **The role of organisational and cultural factors in the implementation of system-wide**  
4 **interventions in acute hospitals to improve patient outcomes: a systematic literature review**  
5  
6  
7

8 **ABSTRACT**  
9

10  
11 **Introduction:** Little is known about the role of organisational culture in the success and  
12 sustainability of the hospital-wide interventions, and how local culture affects patient outcomes  
13 in acute hospitals.  
14  
15  
16  
17

18 **Methods and analysis:** A systematic literature review will be conducted to identify  
19 organisational factors influencing hospital-wide interventions and patient outcomes. A search of  
20 English language articles will be performed in MEDLINE, CINAHL, EMBASE, Web of  
21 Science, PsychInfo and Global Health databases using Medical Subject Headings and keywords.  
22  
23  
24  
25  
26  
27  
28  
29  
30  
31  
32  
33  
34  
35  
36  
37  
38  
39  
40  
41  
42  
43  
44  
45  
46  
47  
48  
49  
50  
51  
52  
53  
54  
55  
56  
57  
58  
59  
60

Randomised controlled trials, quasi-randomised trials, controlled before and after design studies and interrupted time-series analysis studies will be included. ‘Grey literature’ will be excluded, however peer reviewed journals that are likely to publish relevant studies (JAMA, BMJ, BMJ Quality and Safety, New England Journal of Medicine and Implementation Science) will be hand searched for the last five years. Two reviewers independently will undertake a title and abstract review using inclusion and exclusion criteria. Studies will be excluded only after discussion between at least two reviewers, who will assess and agree on the inclusion, risk of bias and quality rating of the studies. One author will extract summary descriptive data from these studies; the second author will review this documentation for accuracy and completeness. It is likely that the studies will be heterogeneous in nature, therefore a narrative synthesis of the findings will be conducted. We will discuss characteristics of the studies and stratify the results according to the type of hospital-wide interventions, organisational factors associated with them and outcomes measured.



1  
2  
3 **Ethics and dissemination:** Findings will be reported via peer-reviewed publications, conference  
4 and seminar presentations. The PRISMA checklist will be applied. No ethics approval was  
5  
6 required, as this is a literature review only. The protocol has been registered in the international  
7  
8 prospective register of systematic reviews, PROSPERO (Registration No: CRD42013003050).  
9  
10  
11  
12  
13  
14  
15  
16  
17  
18  
19  
20  
21  
22  
23  
24  
25  
26  
27  
28  
29  
30  
31  
32  
33  
34  
35  
36  
37  
38  
39  
40  
41  
42  
43  
44  
45  
46  
47  
48  
49  
50  
51  
52  
53  
54  
55  
56  
57  
58  
59  
60

For peer review only

## ARTICLE SUMMARY

### Article focus

- This review aims to identify the organisational factors that affect the implementation of hospital-wide interventions in acute hospitals, and how these organisational factors and hospital-wide interventions influence patient outcomes.

### Key messages

- Silos, or vertical structures within hospitals such as wards, units, and departments, are well developed in acute care hospitals, but the system may fail at the intersection between silos for patients with complications of the original illness, which are outside the expertise of the admitting clinician.
- To bridge these intersections and thereby reduce the potential preventable adverse events for an increasingly aged and ill hospital population with comorbidities, organisation-wide patient safety interventions are becoming a major focus of health care delivery.
- Little is known about the cultural and organisational determinants of hospital-wide interventions and their effects on patient outcomes.

### Strengths and limitations of this project

- This study aims to increase our knowledge of organisational culture, which we believe is an important element in the success or failure of the implementation of hospital-wide interventions.
- We will investigate how the adoption of a system-wide intervention can affect patient outcomes.

- We will be including observational studies as well as controlled before and after studies in the systematic review, as it is likely they will provide valuable information.
- We include only English language studies.
- Risk of bias may occur by inclusion of non-randomised studies, but we will mitigate this risk by only accepting papers with high quality evidence and validated data.

For peer review only

## INTRODUCTION

Despite the remarkable advances in healthcare delivery and considerable changes in hospital patient populations and expectations associated with modern medicine, the fundamental organisation of hospitals has changed little into the twenty first century. The system is constructed around the admitting doctor and patient relationship.<sup>1</sup> In acute hospitals, wards are able to manage the day-to-day aspects of a patient's condition, but the system can fail when the patient's condition deteriorates and the admitting doctor no longer has the skills or knowledge to neither recognise nor manage the deteriorating patient.<sup>1-3</sup> One of the first organisation wide and patient centred systems, known as the Medical Emergency Team (MET) or Rapid Response System (RRS) has been implemented in many hospitals around the world to address this situation.<sup>4 5</sup> When the criteria that define an at-risk or deteriorating patient are met, a team of clinicians with appropriate skills urgently responds to the patient. However, because of the nature of hospitals, and depending on the existence of necessary infrastructure to provide the continuity of care,<sup>2</sup> the effectiveness of the few-implemented hospital-wide interventions, such as an RRS, varies significantly from one health organisation to another.<sup>6</sup> Ultimately, we are interested in determining why interventions such as MET are successful in some settings but not in others. By examining hospital-wide interventions in acute care systems (including non-MET interventions) via this systematic literature review, we hope to shed some light on the problem.

While there is keen interest in how to optimise and implement the system, little is known about the role of organisational culture<sup>7-10</sup> in the success and sustainability of the hospital-wide interventions, and how the culture could affect patient outcomes in acute hospitals. Patient safety interventions working at an organisational level that include participative principles, such as the involvement of workers in design and implementation, may provide the greatest hope of

1  
2  
3 improving patient safety.<sup>11-13</sup> We note the identification of limitations in the literature such as  
4 those identified by Kaplan et al. 2010,<sup>14</sup> including the lack of a practical conceptual model, the  
5 lack of clear definitions of contextual factors and the lack of well-specified measures. This  
6 protocol details the processes of a systematic literature review that aims to identify the  
7 organisational and cultural factors<sup>10 15</sup> affecting the adoption and success of hospital-wide  
8 interventions in acute hospitals, and to assess the effects of those factors on patient outcomes.  
9

## 17 **METHODS AND ANALYSIS**

### 20 **Search Strategy**

21 We will search MEDLINE, CINAHL, EMBASE, Web of Science, PsychInfo, Global Health,  
22 using Medical Subject Headings and keywords, from 1946, 1991, 1947, 1934, 1967, 1910,  
23 respectively to September 2012. The general search strategy is shown in Box 1 and the subject  
24 heading will be adjusted for each database. We will use multiple terms to identify culture and  
25 intervention. The search will be restricted to English language articles (the authors do not have  
26 resources for translation) and we will hand search the journals, JAMA, BMJ, BMJ Quality and  
27 Safety, New England Journal of Medicine and Implementation Science, separately for the last  
28 five years (from 2007-2012). The peer reviewed journals were chosen as the most likely to  
29 publish studies that meet inclusion criteria. We will also hand search the reference lists of the  
30 relevant Cochrane systematic reviews.  
31  
32  
33  
34  
35  
36  
37  
38  
39  
40  
41  
42  
43  
44  
45  
46  
47

### 48 **Box 1. General search strategy**

1. Organisational culture OR organisational climate OR organisational context OR organisational characteristics OR workplace culture OR organisational goal OR organisational value
2. AND [(adopting organisation) OR (adherence to protocol) OR (organisational innovation) OR (diffusion of innovation) OR (intervention) OR (diffusion) OR (organisational change) OR (protocol change) OR (practice change) OR (structure change) OR (adoption) OR (leadership)]
3. AND (patient outcome)
4. AND [healthcare organisation OR hospital OR healthcare facility]

### Study Selection and exclusion criteria

Under the review's inclusion and exclusion criteria, research must focus on a hospital-wide intervention, i.e., mere implementation in the operation theatre, a few general units or ICU is not sufficient. Other inclusion criteria include investigating the organisational factors that may affect the implementation. Studies should also provide patient outcome data before and after the hospital-wide intervention. The review will only include interventions in an acute care setting, i.e., rehabilitation centres, primary health cares, ambulatory services, and psychiatric facilities will be excluded. Other inclusion criteria include that the study report on empirical research, in peer reviewed, English language, scholarly journals, and that abstract and full text are available. The 'grey literature' will be excluded as it is unlikely to yield study designs that meet inclusion criteria.

We will not limit our search to randomised controlled trial studies, since we believe observational studies and controlled before and after studies -- with validated data about patient outcomes -- can provide useful information to identify the organisational and cultural determinants of hospital-wide interventions.

References identified in the search will be reviewed for inclusion by two researchers. Studies will be excluded only after discussion between at least two reviewers, who will assess and agree

1  
2  
3 on the inclusion and quality rating of the studies. All papers excluded by consensus will be  
4 depicted in a document explaining reason for exclusion. This process will be conducted  
5 according to the Preferred Reporting Items for Systematic Reviews and Meta-Analyses  
6 (PRISMA) guidelines<sup>16 17</sup> and literature selection will be presented in a PRISMA flow chart.<sup>16</sup>  
7  
8 The selection criteria may limit the generalisability of study findings, however the scope of the  
9 search is appropriate to identify the majority of articles published in the peer review literature  
10 and meeting the study criteria.  
11  
12  
13  
14  
15  
16  
17  
18  
19

### 20 **Participants**

21  
22  
23 Participating hospitals may include any acute care facility, including metropolitan or rural, and  
24 private or public hospitals.  
25  
26  
27

### 28 **Type of interventions**

29  
30  
31 As noted, we will only include interventions that are hospital-wide and are associated with  
32 patient outcomes through validated data collected before and after implementation of the  
33 intervention. Also, the organisational elements of the intervention should have been explained in  
34 the study to make it qualified for our review.  
35  
36  
37  
38  
39  
40  
41

### 42 **Comparisons**

43  
44  
45 Comparisons may include acute hospitals with similar nursing-patient ratio, size and region with  
46 no intervention.  
47  
48  
49

### 50 **Types of outcome measures**

51  
52  
53 Patient outcomes may include mortality rate, the rate of adverse events, patient satisfaction, and  
54 infection rate.  
55  
56  
57  
58  
59  
60

### **Assessment of risk of bias**

Two reviewers will independently assess risk of bias in eligible studies as outlined in the Cochrane Handbook for Systematic Reviews:<sup>18</sup> selective outcome reporting, and blinding of the research personnel to data collection and analysis. For any non-randomised trials included in the review, the authors will assess any selection bias that may lead to confounding of the outcome. Disagreement regarding assessment of risk of bias will be resolved through discussion between two reviewers. If consensus is not reached, a third reviewer will be consulted.

### **Data Collection and Analysis**

Using a standard form created for the review, one author will extract summary descriptive data from these studies. The same author will compile a tabular presentation the study participants and setting, objective, design and method, type of hospital-wide intervention, organisational/cultural factors, patient/process outcomes, and findings. The second author will independently review this documentation for accuracy and completeness.

### **Strategy for data synthesis**

If suitable data are available, a meta-analysis will be completed; however it is likely that included studies will be heterogeneous in nature. Where trial data cannot be combined, two of the authors will conduct a narrative synthesis of the findings in accordance with the review objectives. We will discuss characteristics of the studies and stratify the results according to the type of hospital-wide interventions, organisational factors associated with them, and outcomes measured. We anticipate that we will not be able to use a quality assessment tool to formally assess the quality of the studies due to their heterogeneous nature.

## **ETHICS AND DISSEMINATION**



1  
2  
3 Ethics is not required given the protocol is a systematic literature review. The findings of this  
4  
5 review will be disseminated through mechanisms including peer-reviewed publications and  
6  
7 conference presentations. The PRISMA checklist<sup>16</sup> will be used for writing the final review.  
8  
9

10  
11 **ACKNOWLEDGEMENTS:** We acknowledge Dr. Isla Hains from the Centre for Health  
12  
13 Systems and Safety Research in the Australian Institute of Health Innovation who provided  
14  
15 guidance regarding the search strategy.  
16  
17

18  
19 **COMPETING INTERESTS:** The authors have no conflict of interest to declare.  
20  
21

22  
23 **AUTHORS' CONTRIBUTIONS:** All authors contributed to the design, drafting and revision  
24  
25 of the paper, and approved the final version to be published.  
26  
27  
28  
29  
30  
31  
32  
33  
34  
35  
36  
37  
38  
39  
40  
41  
42  
43  
44  
45  
46  
47  
48  
49  
50  
51  
52  
53  
54  
55  
56  
57  
58  
59  
60

## REFERENCES

1. Hillman K, Chen J, Young L. The Evolution of the Health Care System. In: DeVita MA, Hillman K, Bellomo R, editors. *Medical Emergency Teams*: Springer New York, 2006:18-23.
2. Hillman K, Chen J, Aneman A. Continuum of hospital care: the role of intensive care. *Curr Opin Crit Care* 2010;16(5):505-09.
3. Hillman KM. Restructuring hospital services. *Med J Australia* 1998;169(5):239-39.
4. Hillman K, Parr M, Flabouris A, Bishop G, Stewart A. Redefining in-hospital resuscitation: the concept of the medical emergency team. *Resuscitation* 2001;48(2):105-10.
5. Sakai T, Devita MA. Rapid response system. *Journal of anesthesia* 2009;23(3):403-8.
6. Hillman K, Chen J, Cretikos M, Bellomo R, Brown D, Doig G, et al. Introduction of the medical emergency team (MET) system: a cluster-randomised controlled trial. *Lancet* 2005;365(9477):2091-7.
7. Braithwaite J. A lasting legacy from Tony Blair? NHS culture change. *JRSM* 2011;104(2):87-89.
8. Braithwaite J, Hyde P, Pope C. *Culture and climate in health care organizations*: Palgrave Macmillan, 2010.
9. Mannion R, Davies H, Harrison S, Konteh F, Greener I, McDonald R. Quantitative explorations of culture and performance relationship. *Changing organisational cultures and hospital performance in the NHS*. Birmingham, England: National Institute for Health Research, Service Delivery and Organisation Programme, 2010:42-72.
10. Mannion R, Davis H, Harrison S, Frederick K, Jacobs R, Walshe K. Changing Management Cultures in the English National Health Service. In: Braithwaite J, Hyde P, Pope C, editors. *Culture and Climate in Health Care Organisations*: palgrave macmillan, 2010:19-30.
11. Grayson ML, Russo PL, Crulckshank M, Bear JL, Gee CA, Hughes CF, et al. Outcomes from the first 2 years of the Australian National Hand Hygiene Initiative. *Med J Australia* 2011;195(10):615-19.
12. Larson EL, Early E, Cloonan P, Sugrue S, Parides M. An organizational climate intervention associated with increased handwashing and decreased nosocomial infections. *Behav Med* 2000;26(1):14-22.
13. Braithwaite J, Coiera E. Beyond patient safety Flatland. *Journal of the Royal Society of Medicine* 2010;103(6):219-25.

1  
2  
3 14. Kaplan HC, Brady PW, Dritz MC, Hooper DK, Linam W, Froehle CM, et al. The influence  
4 of context on quality improvement success in health care: a systematic review of the literature.  
5 *Milbank Quarterly* 2010;88(4):500-59.  
6

7  
8 15. Cameron KS, Freeman SJ. Cultural congruence, strength, and type: Relationships to  
9 effectiveness. *Research in organizational change and development* 1991;5(1):23-58.  
10

11 16. Liberati A, Altman DG, Tetzlaff J, Mulrow C, Gotzsche PC, Ioannidis JP, et al. The  
12 PRISMA statement for reporting systematic reviews and meta-analyses of studies that evaluate  
13 healthcare interventions: explanation and elaboration. *BMJ* 2009;339:b2700.  
14

15  
16 17. Moher D, Liberati A, Tetzlaff J, Altman DG. Preferred reporting items for systematic  
17 reviews and meta-analyses: the PRISMA statement. *BMJ* 2009;339:b2535.  
18

19 18. Higgins J, Green S, Editors. Cochrane Handbook for Systematic Reviews of Interventions.  
20 *The Cochrane Library* 2005(3).  
21  
22  
23  
24  
25  
26  
27  
28  
29  
30  
31  
32  
33  
34  
35  
36  
37  
38  
39  
40  
41  
42  
43  
44  
45  
46  
47  
48  
49  
50  
51  
52  
53  
54  
55  
56  
57  
58  
59  
60

1  
2  
3  
4  
5  
6  
7  
8  
9  
10  
11  
12  
13  
14  
15  
16  
17  
18  
19  
20  
21  
22  
23  
24  
25  
26  
27  
28  
29  
30  
31  
32  
33  
34  
35  
36  
37  
38  
39  
40  
41  
42  
43  
44  
45  
46  
47  
48  
49  
50  
51  
52  
53  
54  
55  
56  
57  
58  
59  
60

## The role of organisational and cultural factors in the implementation of system-wide interventions in acute hospitals to improve patient outcomes: a systematic literature review

**Authors:**

|                                                                        |
|------------------------------------------------------------------------|
| <b>Hadis Nosrati, PhD</b><br>Research Fellow <sup>1</sup>              |
| <b>Robyn Clay-Williams, PhD</b><br>Research Fellow <sup>2</sup>        |
| <b>Frances Cunningham, ScD</b><br>Senior Research Fellow <sup>2</sup>  |
| <b>Ken Hillman,</b><br>Professor and Director <sup>1</sup>             |
| <b>Jeffrey Braithwaite, PhD</b><br>Professor and Director <sup>2</sup> |

**Affiliations:**

|                                                                                                                                                      |
|------------------------------------------------------------------------------------------------------------------------------------------------------|
| 1 The Simpson Centre for Health Services Research<br>Australian Institute of Health Innovation<br>University of New South Wales<br>Sydney, Australia |
| 2 Centre for Clinical Governance Research<br>Australian Institute of Health Innovation<br>University of New South Wales<br>Sydney, Australia         |

**Contact details of corresponding author:**

|                                                                                                                                                 |
|-------------------------------------------------------------------------------------------------------------------------------------------------|
| <b>Dr <a href="#">Robyn Clay-Williams</a></b>                                                                                                   |
| <b>Business:</b> + <a href="#">614 2158 2638</a>                                                                                                |
| <b>Fax:</b> + 612 9663 8692                                                                                                                     |
| <b>Mobile:</b> + 614 <a href="#">2158 2638</a>                                                                                                  |
| <b>Email:</b> <a href="mailto:r.clay-williams@unsw.edu.au">r.clay-williams@unsw.edu.au</a>                                                      |
| <b>Address:</b> Australian Institute of Health Innovation<br>Faculty of Medicine<br>University of New South Wales<br>Sydney NSW 2052, Australia |

**Keywords:**

|                                                                                            |
|--------------------------------------------------------------------------------------------|
| Organisational culture, hospital-wide intervention, patient outcomes, acute care hospitals |
|--------------------------------------------------------------------------------------------|

**Manuscript data:**

|                                            |
|--------------------------------------------|
| <b>Words in abstract:</b> 300              |
| <b>Words in body:</b> <a href="#">1287</a> |
| <b>Tables:</b> 0                           |
| <b>Figures:</b> 1                          |
| <b>References:</b> <a href="#">18</a>      |

**Statements:**

|                                                                                                                                                                                                                                                                                                                                                                                                                                                                                                                                                                                          |
|------------------------------------------------------------------------------------------------------------------------------------------------------------------------------------------------------------------------------------------------------------------------------------------------------------------------------------------------------------------------------------------------------------------------------------------------------------------------------------------------------------------------------------------------------------------------------------------|
| <p><b>Funding:</b> This research is supported under the NSW Department of Health Capacity Building Infrastructure Program, Projects scheme (project RG093684) and National Health and Medical Research Council (NHMRC) program grant 568612.</p> <p><b>Conflict of interest:</b> The authors have no conflict of interest to declare.</p> <p><b>Contributorship:</b> All authors contributed to the design, drafting and revision of the paper, and approved the final version to be published.</p> <p><b>Data sharing:</b> Data available on request from the corresponding author.</p> |
|------------------------------------------------------------------------------------------------------------------------------------------------------------------------------------------------------------------------------------------------------------------------------------------------------------------------------------------------------------------------------------------------------------------------------------------------------------------------------------------------------------------------------------------------------------------------------------------|

1  
2  
3 **The role of organisational and cultural factors in the implementation of system-wide**  
4 **interventions in acute hospitals to improve patient outcomes: a systematic literature review**  
5  
6  
7

8  
9 **ABSTRACT**  
10

11 **Introduction:** ~~To reduce preventable adverse events, there is keen interest in more sustained~~  
12 ~~progress in improving patient safety. However, little~~Little is known about the role of  
13 organisational culture in the success and sustainability of the hospital-wide interventions, and  
14 how local culture affects patient outcomes in acute hospitals.  
15  
16  
17  
18  
19

20  
21 **Methods and analysis:** A systematic literature review will be conducted to identify  
22 organisational factors influencing hospital-wide interventions and patient outcomes. A search of  
23 English language articles will be performed in MEDLINE, CINAHL, EMBASE, Web of  
24 Science, PsychInfo and Global Health databases using Medical Subject Headings and keywords.  
25  
26  
27  
28  
29

30  
31 ~~JAMA, BMJ, BMJ Quality and Safety, New England Journal of Medicine and Implementation~~  
32 ~~Science will be hand searched for the last five years. Randomised controlled trials, quasi-~~  
33 ~~randomised trials, controlled before and after design studies and interrupted time-series analysis~~  
34 ~~studies will be included. The 'grey literature' will be excluded, however, peer reviewed~~  
35 ~~journal that are likely to publish relevant studies (JAMA, BMJ, BMJ Quality and Safety, New~~  
36 ~~England Journal of Medicine and Implementation Science) will be hand searched for the last five~~  
37 ~~years. Randomised controlled trials, quasi-randomised trials, controlled before and after design~~  
38 ~~studies and interrupted time-series analysis studies will be included.~~ Two reviewers  
39 independently will undertake a title and abstract review using inclusion and exclusion criteria.  
40  
41  
42  
43  
44  
45  
46  
47  
48  
49  
50  
51  
52  
53  
54  
55  
56  
57  
58  
59  
60

1  
2  
3 for accuracy and completeness. It is likely that the studies will be heterogeneous in nature, ~~and~~  
4 ~~so~~ therefore a narrative synthesis of the findings will be conducted. We will discuss  
5  
6 characteristics of the studies and stratify the results according to the type of hospital-wide  
7  
8 interventions, organisational factors associated with them and outcomes measured.  
9  
10

11  
12 **Ethics and dissemination:** ~~The findings of this systematic literature review~~ Findings will be  
13 reported via peer-reviewed publications, conference and seminar presentations. The PRISMA  
14 checklist will be applied. No ethics approval ~~is considered indicated~~ was required, as this is a  
15 literature review only. The protocol has been registered in the international prospective register  
16 of systematic reviews, PROSPERO (Registration No: CRD42013003050).  
17  
18  
19  
20  
21  
22  
23  
24  
25  
26  
27  
28  
29  
30  
31  
32  
33  
34  
35  
36  
37  
38  
39  
40  
41  
42  
43  
44  
45  
46  
47  
48  
49  
50  
51  
52  
53  
54  
55  
56  
57  
58  
59  
60

**ARTICLE SUMMARY****Article focus**

- This review aims to identify the organisational factors that affect the implementation of hospital-wide interventions in acute hospitals, and how these organisational factors and hospital-wide interventions influence patient outcomes.

**Key messages**

- Silos, or vertical structures within hospitals such as wards, units, and departments, are well developed in acute care hospitals, but the system may fail at the intersection between silos for patients with complications of the original illness, which are outside the expertise of the admitting clinician.
- To bridge these intersections and thereby reduce the potential preventable adverse events for an increasingly aged and ill hospital population with comorbidities, organisation-wide patient safety interventions are becoming a major focus of health care delivery.
- Little is known about the cultural and organisational determinants of hospital-wide interventions and their effects on patient outcomes.

**Strengths and limitations of this project**

- This study aims to increase our knowledge of organisational culture, which we believe is an important element in the success or failure of the implementation of hospital-wide interventions.
- We will investigate how the adoption of a system-wide intervention can affect patient outcomes.

- We will be including observational studies as well as controlled before and after studies in the systematic review, as it is likely they will provide valuable information.
- We include only English language studies.
- Risk of bias may occur by inclusion of non-randomised studies, but we will mitigate this risk by only accepting papers with high quality evidence and validated data.

For peer review only



## INTRODUCTION

Despite the remarkable advances in healthcare delivery and considerable changes in hospital patient populations and expectations associated with modern medicine, the fundamental organisation of hospitals has changed little into the twenty first century. The system is constructed around the admitting doctor and patient relationship.<sup>1</sup> In acute hospitals, wards are able to manage the day-to-day aspects of a patient's condition, but the system can fail when the patient's condition deteriorates and the admitting doctor no longer has the skills or knowledge to neither recognise nor manage the deteriorating patient.<sup>1-3</sup> One of the first organisation wide and patient centred systems, known as the Medical Emergency Team (MET) or Rapid Response System (RRS) has been implemented in many hospitals around the world to address this situation.<sup>4 5</sup> When the criteria that define an at-risk or deteriorating patient are met, a team of clinicians with appropriate skills urgently responds to the patient. However, because of the nature of hospitals, and depending on the existence of necessary infrastructure to provide the continuity of care,<sup>2</sup> the effectiveness of the few-implemented hospital-wide interventions, such as an RRS, varies significantly from one health organisation to another.<sup>6</sup> Ultimately, we are interested in determining why interventions such as MET are successful in some settings but not in others. By examining hospital-wide interventions in acute care systems (including non-MET interventions) via this systematic literature review, we hope to shed some light on the problem.

While there is keen interest in how to optimise and implement the system, little is known about the role of organisational culture<sup>7-10</sup> in the success and sustainability of the hospital-wide interventions, and how the culture could affect patient outcomes in acute hospitals. Patient safety interventions working at an organisational level that include participative principles, such as the involvement of workers in design and implementation, may provide the greatest hope of

1  
2  
3 improving patient safety.<sup>11-13</sup> We note the identification of limitations in the literature such as  
4 those identified by Kaplan et al. 2010,<sup>14</sup> including the lack of a practical conceptual model, the  
5 lack of clear definitions of contextual factors and the lack of well-specified measures. This  
6  
7  
8  
9  
10 protocol details the processes of a systematic literature review that aims to identify the  
11  
12 organisational and cultural factors<sup>10 15</sup> affecting the adoption and success of hospital-wide  
13  
14 interventions in acute hospitals, and to assess the effects of those factors on patient outcomes.  
15  
16

## 17 **METHODS AND ANALYSIS**

### 18 **Search Strategy**

19  
20  
21 We will search MEDLINE, CINAHL, EMBASE, Web of Science, PsychInfo, Global Health,  
22  
23 using Medical Subject Headings and keywords, from 1946, 1991, 1947, 1934, 1967, 1910,  
24  
25 respectively to September 2012. The general search strategy is shown in Box 1 and the subject  
26  
27 heading will be adjusted for each database. We will use multiple terms to identify culture and  
28  
29 intervention. ~~We will restrict the~~The search will be restricted to English language articles (the  
30  
31 authors do not have resources for translation) and we will hand search the journals, JAMA, BMJ,  
32  
33 BMJ Quality and Safety, New England Journal of Medicine and Implementation Science,  
34  
35 separately for the last five years (from 2007-2012). The peer reviewed journals were chosen as  
36  
37 the most likely to publish studies that meet inclusion criteria. We will also hand search the  
38  
39 reference lists of the relevant Cochrane systematic reviews.  
40  
41  
42  
43  
44  
45  
46  
47

### 48 **Box 1. General search strategy**

1. Organisational culture OR organisational climate OR organisational context OR organisational characteristics OR workplace culture OR organisational goal OR organisational value
2. AND [(adopting organisation) OR (adherence to protocol) OR (organisational innovation) OR (diffusion of innovation) OR (intervention) OR (diffusion) OR (organisational change) OR (protocol change) OR (practice change) OR (structure change) OR (adoption) OR (leadership)]
3. AND (patient outcome)
4. AND [healthcare organisation OR hospital OR healthcare facility]

### Study Selection and exclusion criteria

Under the review's inclusion and exclusion criteria, research must focus on a hospital-wide intervention, i.e., mere implementation in the operation theatre, a few general units or ICU is not sufficient. Other inclusion criteria include investigating the organisational factors that may affect the implementation. Studies should also provide patient outcome data before and after the hospital-wide intervention. The review will only include interventions in an acute care setting, i.e., rehabilitation centres, primary health cares, ambulatory services, and psychiatric facilities will be excluded. Other inclusion criteria include that the study report on empirical research, in peer reviewed, English language, scholarly journals, and that abstract and full text are available.

The 'grey literature' will be excluded as it is unlikely to yield study designs that meet inclusion criteria. Therefore, we will not include 'grey literature'.

We will not limit our search to randomised controlled trial studies, since we believe observational studies and controlled before and after studies -- with validated data about patient outcomes -- can provide useful information to identify the organisational and cultural determinants of hospital-wide interventions.

References identified in the search will be reviewed for inclusion by two researchers. Studies will be excluded only after discussion between at least two reviewers, who will assess and agree

1  
2  
3 on the inclusion and quality rating of the studies. All papers excluded by consensus will be  
4 depicted in a document explaining reason for exclusion. This process will be conducted  
5 according to the Preferred Reporting Items for Systematic Reviews and Meta-Analyses  
6 (PRISMA) guidelines<sup>16 17</sup> and literature selection will be presented in a PRISMA flow chart.<sup>16</sup>  
7  
8  
9

10  
11 The selection criteria may limit the generalisability of study findings, however the scope of the  
12 search is appropriate to identify the majority of articles published in the peer review literature  
13 and meeting the study criteria.  
14  
15  
16  
17  
18  
19

## 20 **Participants**

21  
22 Participating hospitals may include any acute care facility, including metropolitan or rural, and  
23 private or public hospitals.  
24  
25  
26  
27

## 28 **Type of interventions**

29  
30 As noted, we will only include interventions that are hospital-wide and are associated with  
31 patient outcomes through validated data collected before and after implementation of the  
32 intervention. Also, the organisational elements of the intervention should have been explained in  
33 the study to make it qualified for our review.  
34  
35  
36  
37  
38  
39  
40  
41

## 42 **Comparisons**

43  
44 Comparisons may include acute hospitals with similar nursing-patient ratio, size and region with  
45 no intervention.  
46  
47  
48  
49

## 50 **Types of outcome measures**

51  
52 Patient outcomes may include mortality rate, the rate of adverse events, patient satisfaction, and  
53 infection rate.  
54  
55  
56  
57  
58  
59  
60

### Assessment of risk of bias

Two reviewers will independently assess risk of bias in eligible studies as outlined in the Cochrane Handbook for Systematic Reviews:<sup>18</sup> selective outcome reporting, and blinding of the research personnel to data collection and analysis. For any non-randomised trials included in the review, the authors will assess any selection bias that may lead to confounding of the outcome. Disagreement regarding assessment of risk of bias will be resolved through discussion between two reviewers. If consensus is not reached, a third reviewer will be consulted.

### Data Collection and Analysis

Using a standard form created for the review, one author will ~~abstract~~extract summary descriptive data from these studies. The same author will compile a tabular presentation the study participants and setting, objective, design and method, type of hospital-wide intervention, organisational/cultural factors, patient/process outcomes, and findings. The second author will independently review this documentation for accuracy and completeness.

### Strategy for data synthesis

If suitable data are available, a meta-analysis will be completed; however it is likely that included studies will be heterogeneous in nature. and so we will conduct Where trial data cannot be combined, two of the authors will conduct a narrative synthesis of the findings in accordance with the review objectives. We will discuss characteristics of the studies and stratify the results according to the type of hospital-wide interventions, organisational factors associated with them, and outcomes measured. We anticipate that we will not be able to use a quality assessment tool to formally assess the quality of the studies due to their heterogeneous nature.

### ETHICS AND DISSEMINATION

1  
2  
3 Ethics is not required given the protocol is a systematic literature review. The findings of this  
4  
5 review will be disseminated through mechanisms including peer-reviewed publications and  
6  
7 conference presentations. The PRISMA checklist<sup>16</sup> will be used for writing the final review.  
8  
9

10  
11 **ACKNOWLEDGEMENTS:** We acknowledge Dr. Isla Hains from the Centre for Health  
12  
13 Systems and Safety Research in the Australian Institute of Health Innovation who provided  
14  
15 guidance regarding the search strategy.  
16  
17

18  
19 **COMPETING INTERESTS:** The authors have no conflict of interest to declare.  
20  
21

22  
23 **AUTHORS' CONTRIBUTIONS:** All authors contributed to the design, drafting and revision  
24  
25 of the paper, and approved the final version to be published.  
26  
27  
28  
29  
30  
31  
32  
33  
34  
35  
36  
37  
38  
39  
40  
41  
42  
43  
44  
45  
46  
47  
48  
49  
50  
51  
52  
53  
54  
55  
56  
57  
58  
59  
60

## REFERENCES

1. Hillman K, Chen J, Young L. The Evolution of the Health Care System. In: DeVita MA, Hillman K, Bellomo R, editors. *Medical Emergency Teams*: Springer New York, 2006:18-23.
2. Hillman K, Chen J, Aneman A. Continuum of hospital care: the role of intensive care. *Curr Opin Crit Care* 2010;16(5):505-09.
3. Hillman KM. Restructuring hospital services. *Med J Australia* 1998;169(5):239-39.
4. Hillman K, Parr M, Flabouris A, Bishop G, Stewart A. Redefining in-hospital resuscitation: the concept of the medical emergency team. *Resuscitation* 2001;48(2):105-10.
5. Sakai T, Devita MA. Rapid response system. *Journal of anaesthesia* 2009;23(3):403-8.
6. Hillman K, Chen J, Cretikos M, Bellomo R, Brown D, Doig G, et al. Introduction of the medical emergency team (MET) system: a cluster-randomised controlled trial. *Lancet* 2005;365(9477):2091-7.
7. Braithwaite J. A lasting legacy from Tony Blair? NHS culture change. *JRSM* 2011;104(2):87-89.
8. Braithwaite J, Hyde P, Pope C. *Culture and climate in health care organizations*: Palgrave Macmillan, 2010.
9. Mannion R, Davies H, Harrison S, Konteh F, Greener I, McDonald R. Quantitative explorations of culture and performance relationship. *Changing organisational cultures and hospital performance in the NHS*. Birmingham, England: National Institute for Health Research, Service Delivery and Organisation Programme, 2010:42-72.
10. Mannion R, Davis H, Harrison S, Frederick K, Jacobs R, Walshe K. Changing Management Cultures in the English National Health Service. In: Braithwaite J, Hyde P, Pope C, editors. *Culture and Climate in Health Care Organisations*: palgrave macmillan, 2010:19-30.
11. Grayson ML, Russo PL, Crulckshank M, Bear JL, Gee CA, Hughes CF, et al. Outcomes from the first 2 years of the Australian National Hand Hygiene Initiative. *Med J Australia* 2011;195(10):615-19.
12. Larson EL, Early E, Cloonan P, Sugrue S, Parides M. An organizational climate intervention associated with increased handwashing and decreased nosocomial infections. *Behav Med* 2000;26(1):14-22.
13. Braithwaite J, Coiera E. Beyond patient safety Flatland. *Journal of the Royal Society of Medicine* 2010;103(6):219-25.

- 1  
2  
3  
4  
5  
6  
7  
8  
9  
10  
11  
12  
13  
14  
15  
16  
17  
18  
19  
20  
21  
22  
23  
24  
25  
26  
27  
28  
29  
30  
31  
32  
33  
34  
35  
36  
37  
38  
39  
40  
41  
42  
43  
44  
45  
46  
47  
48  
49  
50  
51  
52  
53  
54  
55  
56  
57  
58  
59  
60
14. Kaplan HC, Brady PW, Dritz MC, Hooper DK, Linam W, Froehle CM, et al. The influence of context on quality improvement success in health care: a systematic review of the literature. *Milbank Quarterly* 2010;88(4):500-59.
15. Cameron KS, Freeman SJ. Cultural congruence, strength, and type: Relationships to effectiveness. *Research in organizational change and development* 1991;5(1):23-58.
16. Liberati A, Altman DG, Tetzlaff J, Mulrow C, Gotzsche PC, Ioannidis JP, et al. The PRISMA statement for reporting systematic reviews and meta-analyses of studies that evaluate healthcare interventions: explanation and elaboration. *BMJ* 2009;339:b2700.
17. Moher D, Liberati A, Tetzlaff J, Altman DG. Preferred reporting items for systematic reviews and meta-analyses: the PRISMA statement. *BMJ* 2009;339:b2535.
18. Higgins J, Green S, Editors. Cochrane Handbook for Systematic Reviews of Interventions. *The Cochrane Library* 2005(3).





**The role of organisational and cultural factors in the implementation of system-wide interventions in acute hospitals to improve patient outcomes: protocol for a systematic literature review**

|                                 |                                                                                                                                                                                                                                                                                                                                                                                                                                                                                   |
|---------------------------------|-----------------------------------------------------------------------------------------------------------------------------------------------------------------------------------------------------------------------------------------------------------------------------------------------------------------------------------------------------------------------------------------------------------------------------------------------------------------------------------|
| Journal:                        | <i>BMJ Open</i>                                                                                                                                                                                                                                                                                                                                                                                                                                                                   |
| Manuscript ID:                  | bmjopen-2012-002268.R2                                                                                                                                                                                                                                                                                                                                                                                                                                                            |
| Article Type:                   | Protocol                                                                                                                                                                                                                                                                                                                                                                                                                                                                          |
| Date Submitted by the Author:   | 25-Jan-2013                                                                                                                                                                                                                                                                                                                                                                                                                                                                       |
| Complete List of Authors:       | Nosrati, Hadis; The Simpson Centre for Health Services Research, University of New South Wales<br>Clay-Williams, Robyn; Centre for Clinical Governance Research, University of New South Wales<br>Cunningham, Frances; University of NSW, Centre for Clinical Governance Research<br>Hillman, Ken; The Simpson Centre for Health Services Research, University of New South Wales<br>Braithwaite, Jeffrey; Centre for Clinical Governance Research, University of New South Wales |
| <b>Primary Subject Heading</b>: | Health services research                                                                                                                                                                                                                                                                                                                                                                                                                                                          |
| Secondary Subject Heading:      | Evidence based practice                                                                                                                                                                                                                                                                                                                                                                                                                                                           |
| Keywords:                       | health service research, Performance measures, Healthcare quality improvement                                                                                                                                                                                                                                                                                                                                                                                                     |
|                                 |                                                                                                                                                                                                                                                                                                                                                                                                                                                                                   |

SCHOLARONE™  
Manuscripts

**The role of organisational and cultural factors in the implementation of system-wide interventions in acute hospitals to improve patient outcomes: a systematic literature review**

**Authors:**

|                                                                        |
|------------------------------------------------------------------------|
| <b>Hadis Nosrati, PhD</b><br>Research Fellow <sup>1</sup>              |
| <b>Robyn Clay-Williams, PhD</b><br>Research Fellow <sup>2</sup>        |
| <b>Frances Cunningham, ScD</b><br>Senior Research Fellow <sup>2</sup>  |
| <b>Ken Hillman,</b><br>Professor and Director <sup>1</sup>             |
| <b>Jeffrey Braithwaite, PhD</b><br>Professor and Director <sup>2</sup> |

**Affiliations:**

1 The Simpson Centre for Health Services Research  
Australian Institute of Health Innovation  
University of New South Wales  
Sydney, Australia  
2 Centre for Clinical Governance Research  
Australian Institute of Health Innovation  
University of New South Wales  
Sydney, Australia

**Contact details of corresponding author:**

|                                                                                                                                                 |
|-------------------------------------------------------------------------------------------------------------------------------------------------|
| <b>Dr Robyn Clay-Williams</b>                                                                                                                   |
| <b>Business:</b> + 614 2158 2638                                                                                                                |
| <b>Fax:</b> + 612 9663 8692                                                                                                                     |
| <b>Mobile:</b> + 614 2158 2638                                                                                                                  |
| <b>Email:</b> r.clay-williams@unsw.edu.au                                                                                                       |
| <b>Address:</b> Australian Institute of Health Innovation<br>Faculty of Medicine<br>University of New South Wales<br>Sydney NSW 2052, Australia |

**Keywords:**

Organisational culture, hospital-wide intervention, patient outcomes, acute care hospitals

**Manuscript data:**

**Words in abstract:** 300  
**Words in body:** 1287  
**Tables:** 0  
**Figures:** 1  
**References:** 18

**Statements:**

**Funding:** This research is supported under the NSW Department of Health Capacity Building Infrastructure Program, Projects scheme (project RG093684) and National Health and Medical Research Council (NHMRC) program grant 568612.

**Conflict of interest:** The authors have no conflict of interest to declare.

**Contributorship:** All authors contributed to the design, drafting and revision of the paper, and approved the final version to be published.

**Data sharing:** Data available on request from the corresponding author.

1  
2  
3 **The role of organisational and cultural factors in the implementation of system-wide**  
4 **interventions in acute hospitals to improve patient outcomes: a systematic literature review**  
5  
6  
7

8 **ABSTRACT**  
9

10  
11 **Introduction:** Little is known about the role of organisational culture in the success and  
12 sustainability of the hospital-wide interventions, and how local culture affects patient outcomes  
13 in acute hospitals.  
14  
15  
16

17  
18 **Methods and analysis:** A systematic literature review will be conducted to identify  
19 organisational factors influencing hospital-wide interventions and patient outcomes. A search of  
20 English language articles will be performed in MEDLINE, CINAHL, EMBASE, Web of  
21 Science, PsychInfo and Global Health databases using Medical Subject Headings and keywords.  
22  
23  
24  
25  
26  
27  
28  
29  
30  
31  
32  
33  
34  
35  
36  
37  
38  
39  
40  
41  
42  
43  
44  
45  
46  
47  
48  
49  
50  
51  
52  
53  
54  
55  
56  
57  
58  
59  
60

Randomised controlled trials, quasi-randomised trials, controlled before and after design studies and interrupted time-series analysis studies will be included. ‘Grey literature’ will be excluded, however peer reviewed journals that are likely to publish relevant studies (JAMA, BMJ, BMJ Quality and Safety, Lancet, New England Journal of Medicine and Implementation Science) will be hand searched for the last five years. Two reviewers independently will undertake a title and abstract review using inclusion and exclusion criteria. Studies will be excluded only after discussion between at least two reviewers, who will assess and agree on the inclusion, risk of bias and quality rating of the studies. One author will extract summary descriptive data from these studies; the second author will review this documentation for accuracy and completeness. It is likely that the studies will be heterogeneous in nature, therefore a narrative synthesis of the findings will be conducted. We will discuss characteristics of the studies and stratify the results according to the type of hospital-wide interventions, organisational factors associated with them and outcomes measured.

1  
2  
3 **Ethics and dissemination:** Findings will be reported via peer-reviewed publications, conference  
4 and seminar presentations. The PRISMA checklist will be applied. No ethics approval was  
5  
6 required, as this is a literature review only. The protocol has been registered in the international  
7  
8 prospective register of systematic reviews, PROSPERO (Registration No: CRD42013003050).  
9  
10  
11  
12  
13  
14  
15  
16  
17  
18  
19  
20  
21  
22  
23  
24  
25  
26  
27  
28  
29  
30  
31  
32  
33  
34  
35  
36  
37  
38  
39  
40  
41  
42  
43  
44  
45  
46  
47  
48  
49  
50  
51  
52  
53  
54  
55  
56  
57  
58  
59  
60

For peer review only

## ARTICLE SUMMARY

### Article focus

- This review aims to identify the organisational factors that affect the implementation of hospital-wide interventions in acute hospitals, and how these organisational factors and hospital-wide interventions influence patient outcomes.

### Key messages

- Silos, or vertical structures within hospitals such as wards, units, and departments, are well developed in acute care hospitals, but the system may fail at the intersection between silos for patients with complications of the original illness, which are outside the expertise of the admitting clinician.
- To bridge these intersections and thereby reduce the potential preventable adverse events for an increasingly aged and ill hospital population with comorbidities, organisation-wide patient safety interventions are becoming a major focus of health care delivery.
- Little is known about the cultural and organisational determinants of hospital-wide interventions and their effects on patient outcomes.

### Strengths and limitations of this project

- This study aims to increase our knowledge of organisational culture, which we believe is an important element in the success or failure of the implementation of hospital-wide interventions.
- We will investigate how the adoption of a system-wide intervention can affect patient outcomes.

- We will be including observational studies as well as controlled before and after studies in the systematic review, as it is likely they will provide valuable information.
- We include only English language studies.
- Risk of bias will be assessed using standard Cochrane criteria.

For peer review only

## INTRODUCTION

Despite the remarkable advances in healthcare delivery and considerable changes in hospital patient populations and expectations associated with modern medicine, the fundamental organisation of hospitals has changed little into the twenty first century. The system is constructed around the admitting doctor and patient relationship.<sup>1</sup> In acute hospitals, wards are able to manage the day-to-day aspects of a patient's condition, but the system can fail when the patient's condition deteriorates and the admitting doctor no longer has the skills or knowledge to neither recognise nor manage the deteriorating patient.<sup>1-3</sup> One of the first organisation wide and patient centred systems, known as the Medical Emergency Team (MET) or Rapid Response System (RRS) has been implemented in many hospitals around the world to address this situation.<sup>4 5</sup> When the criteria that define an at-risk or deteriorating patient are met, a team of clinicians with appropriate skills urgently responds to the patient. However, because of the nature of hospitals, and depending on the existence of necessary infrastructure to provide the continuity of care,<sup>2</sup> the effectiveness of the few-implemented hospital-wide interventions, such as an RRS, varies significantly from one health organisation to another.<sup>6</sup> Ultimately, we are interested in determining why interventions such as MET are successful in some settings but not in others. By examining hospital-wide interventions in acute care systems (including non-MET interventions) via this systematic literature review, we hope to shed some light on the problem.

While there is keen interest in how to optimise and implement the system, little is known about the role of organisational culture<sup>7-10</sup> in the success and sustainability of the hospital-wide interventions, and how the culture could affect patient outcomes in acute hospitals. Patient safety interventions working at an organisational level that include participative principles, such as the involvement of workers in design and implementation, may provide the greatest hope of

1  
2  
3 improving patient safety.<sup>11-13</sup> We note the identification of limitations in the literature such as  
4 those identified by Kaplan et al. 2010,<sup>14</sup> including the lack of a practical conceptual model, the  
5 lack of clear definitions of contextual factors and the lack of well-specified measures. This  
6 protocol details the processes of a systematic literature review that aims to identify the  
7 organisational and cultural factors<sup>10 15</sup> affecting the adoption and success of hospital-wide  
8 interventions in acute hospitals, and to assess the effects of those factors on patient outcomes.  
9

## 17 **METHODS AND ANALYSIS**

### 20 **Search Strategy**

21  
22 We will search MEDLINE, CINAHL, EMBASE, Web of Science, PsychInfo, Global Health,  
23 using Medical Subject Headings and keywords, from 1946, 1991, 1947, 1934, 1967, 1910,  
24 respectively to September 2012. The general search strategy is shown in Box 1 and the subject  
25 heading will be adjusted for each database. We will use multiple terms to identify culture and  
26 intervention. The search will be restricted to English language articles (the authors do not have  
27 resources for translation) and we will hand search the journals, JAMA, BMJ, BMJ Quality and  
28 Safety, Lancet, New England Journal of Medicine and Implementation Science, separately for  
29 the last five years (from 2007-2012). The peer reviewed journals were chosen as the most likely  
30 to publish studies that meet inclusion criteria, in particular validated patient outcomes. Although  
31 PLOS Medicine and BMJ Open are also likely to publish studies that meet our criteria, both are  
32 open access online journals with all articles linked to PubMed at time of publication, therefore  
33 we expect that the online search engines will capture relevant papers from these journals. We  
34 will also hand search the reference lists of the relevant Cochrane systematic reviews.  
35  
36  
37  
38  
39  
40  
41  
42  
43  
44  
45  
46  
47  
48  
49  
50  
51  
52  
53  
54

### 55 **Box 1. General search strategy**

56  
57  
58  
59  
60



1. Organisational culture OR organisational climate OR organisational context OR organisational characteristics OR workplace culture OR organisational goal OR organisational value
2. AND [(adopting organisation) OR (adherence to protocol) OR (organisational innovation) OR (diffusion of innovation) OR (intervention) OR (diffusion) OR (organisational change) OR (protocol change) OR (practice change) OR (structure change) OR (adoption) OR (leadership)]
3. AND (patient outcome)
4. AND [healthcare organisation OR hospital OR healthcare facility]

### Study Selection and exclusion criteria

Under the review's inclusion and exclusion criteria, research must focus on a hospital-wide intervention, i.e., mere implementation in the operation theatre, a few general units or ICU is not sufficient. Other inclusion criteria include investigating the organisational factors that may affect the implementation. Studies should also provide patient outcome data before and after the hospital-wide intervention. The review will only include interventions in an acute care setting, i.e., rehabilitation centres, primary health cares, ambulatory services, and psychiatric facilities will be excluded. Other inclusion criteria include that the study report on empirical research, in peer reviewed, English language, scholarly journals, and that abstract and full text are available. The 'grey literature' will be excluded as it is unlikely to yield study designs that meet inclusion criteria.

We will not limit our search to randomised controlled trial studies, since we believe observational studies and controlled before and after studies -- with validated data about patient outcomes -- can provide useful information to identify the organisational and cultural determinants of hospital-wide interventions.

References identified in the search will be reviewed for inclusion by two researchers. Studies will be excluded only after discussion between at least two reviewers, who will assess and agree

1  
2  
3 on the inclusion and quality rating of the studies. All papers excluded by consensus will be  
4 depicted in a document explaining reason for exclusion. This process will be conducted  
5 according to the Preferred Reporting Items for Systematic Reviews and Meta-Analyses  
6 (PRISMA) guidelines<sup>16 17</sup> and literature selection will be presented in a PRISMA flow chart.<sup>16</sup>  
7  
8 The selection criteria may limit the generalisability of study findings, however the scope of the  
9 search is appropriate to identify the majority of articles published in the peer review literature  
10 and meeting the study criteria.  
11  
12  
13  
14  
15  
16  
17  
18  
19

### 20 **Participants**

21  
22 Participating hospitals may include any acute care facility, including metropolitan or rural, and  
23 private or public hospitals.  
24  
25  
26  
27  
28

### 29 **Type of interventions**

30  
31 As noted, we will only include interventions that are hospital-wide and are associated with  
32 patient outcomes through validated data collected before and after implementation of the  
33 intervention. Also, the organisational elements of the intervention should have been explained in  
34 the study to make it qualified for our review.  
35  
36  
37  
38  
39  
40  
41

### 42 **Comparisons**

43  
44 Comparisons may include acute hospitals with similar nursing-patient ratio, size and region with  
45 no intervention.  
46  
47  
48  
49

### 50 **Types of outcome measures**

51  
52 Patient outcomes may include mortality rate, the rate of adverse events, patient satisfaction, and  
53 infection rate.  
54  
55  
56  
57  
58  
59  
60

### Assessment of risk of bias

Two reviewers will independently assess risk of bias in eligible studies as outlined in the Cochrane Handbook for Systematic Reviews:<sup>18</sup> selective outcome reporting, and blinding of the research personnel to data collection and analysis. For any non-randomised trials included in the review, the authors will assess any selection bias that may lead to confounding of the outcome. Disagreement regarding assessment of risk of bias will be resolved through discussion between two reviewers. If consensus is not reached, a third reviewer will be consulted.

### Data Collection and Analysis

Using a standard form created for the review, one author will extract summary descriptive data from these studies. The same author will compile a tabular presentation the study participants and setting, objective, design and method, type of hospital-wide intervention, organisational/cultural factors, patient/process outcomes, and findings. The second author will independently review this documentation for accuracy and completeness.

### Strategy for data synthesis

If suitable data are available, a meta-analysis will be completed; however it is likely that included studies will be heterogeneous in nature. Where trial data cannot be combined, two of the authors will conduct a narrative synthesis of the findings in accordance with the review objectives. We will discuss characteristics of the studies and stratify the results according to the type of hospital-wide interventions, organisational factors associated with them, and outcomes measured. We anticipate that we will not be able to use a quality assessment tool to formally assess the quality of the studies due to their heterogeneous nature.

### Limitations

1  
2  
3 The review findings will be limited by the number and quality of studies identified by the search  
4 strategy. In particular, limiting the hand search to restricted access general medicine publications  
5 that are likely to publish studies with validated patient outcomes places reliance on the search  
6 engines to deliver relevant papers from open access online publications such as BMJ Open and  
7 PLOS Medicine.  
8  
9  
10  
11  
12  
13

## 14 15 16 **ETHICS AND DISSEMINATION** 17

18  
19 Ethics is not required given the protocol is a systematic literature review. The findings of this  
20 review will be disseminated through mechanisms including peer-reviewed publications and  
21 conference presentations. The PRISMA checklist<sup>16</sup> will be used for writing the final review.  
22  
23  
24  
25  
26  
27

28 **ACKNOWLEDGEMENTS:** We acknowledge Dr. Isla Hains from the Centre for Health  
29 Systems and Safety Research in the Australian Institute of Health Innovation who provided  
30 guidance regarding the search strategy.  
31  
32  
33  
34  
35

36 **COMPETING INTERESTS:** The authors have no conflict of interest to declare.  
37  
38

39 **AUTHORS' CONTRIBUTIONS:** All authors contributed to the design, drafting and revision  
40 of the paper, and approved the final version to be published.  
41  
42  
43  
44  
45  
46  
47  
48  
49  
50  
51  
52  
53  
54  
55  
56  
57  
58  
59  
60

## REFERENCES

1. Hillman K, Chen J, Young L. The Evolution of the Health Care System. In: DeVita MA, Hillman K, Bellomo R, editors. *Medical Emergency Teams*: Springer New York, 2006:18-23.
2. Hillman K, Chen J, Aneman A. Continuum of hospital care: the role of intensive care. *Curr Opin Crit Care* 2010;16(5):505-09.
3. Hillman KM. Restructuring hospital services. *Med J Australia* 1998;169(5):239-39.
4. Hillman K, Parr M, Flabouris A, Bishop G, Stewart A. Redefining in-hospital resuscitation: the concept of the medical emergency team. *Resuscitation* 2001;48(2):105-10.
5. Sakai T, Devita MA. Rapid response system. *Journal of anesthesia* 2009;23(3):403-8.
6. Hillman K, Chen J, Cretikos M, Bellomo R, Brown D, Doig G, et al. Introduction of the medical emergency team (MET) system: a cluster-randomised controlled trial. *Lancet* 2005;365(9477):2091-7.
7. Braithwaite J. A lasting legacy from Tony Blair? NHS culture change. *JRSM* 2011;104(2):87-89.
8. Braithwaite J, Hyde P, Pope C. *Culture and climate in health care organizations*: Palgrave Macmillan, 2010.
9. Mannion R, Davies H, Harrison S, Konteh F, Greener I, McDonald R. Quantitative explorations of culture and performance relationship. *Changing organisational cultures and hospital performance in the NHS*. Birmingham, England: National Institute for Health Research, Service Delivery and Organisation Programme, 2010:42-72.
10. Mannion R, Davis H, Harrison S, Frederick K, Jacobs R, Walshe K. Changing Management Cultures in the English National Health Service. In: Braithwaite J, Hyde P, Pope C, editors. *Culture and Climate in Health Care Organisations*: palgrave macmillan, 2010:19-30.
11. Grayson ML, Russo PL, Crulckshank M, Bear JL, Gee CA, Hughes CF, et al. Outcomes from the first 2 years of the Australian National Hand Hygiene Initiative. *Med J Australia* 2011;195(10):615-19.
12. Larson EL, Early E, Cloonan P, Sugrue S, Parides M. An organizational climate intervention associated with increased handwashing and decreased nosocomial infections. *Behav Med* 2000;26(1):14-22.
13. Braithwaite J, Coiera E. Beyond patient safety Flatland. *Journal of the Royal Society of Medicine* 2010;103(6):219-25.

1  
2  
3 14. Kaplan HC, Brady PW, Dritz MC, Hooper DK, Linam W, Froehle CM, et al. The influence  
4 of context on quality improvement success in health care: a systematic review of the literature.  
5 *Milbank Quarterly* 2010;88(4):500-59.  
6

7  
8 15. Cameron KS, Freeman SJ. Cultural congruence, strength, and type: Relationships to  
9 effectiveness. *Research in organizational change and development* 1991;5(1):23-58.  
10

11 16. Liberati A, Altman DG, Tetzlaff J, Mulrow C, Gotzsche PC, Ioannidis JP, et al. The  
12 PRISMA statement for reporting systematic reviews and meta-analyses of studies that evaluate  
13 healthcare interventions: explanation and elaboration. *BMJ* 2009;339:b2700.  
14

15  
16 17. Moher D, Liberati A, Tetzlaff J, Altman DG. Preferred reporting items for systematic  
17 reviews and meta-analyses: the PRISMA statement. *BMJ* 2009;339:b2535.  
18

19 18. Higgins J, Green S, Editors. Cochrane Handbook for Systematic Reviews of Interventions.  
20 *The Cochrane Library* 2005(3).  
21  
22  
23  
24  
25  
26  
27  
28  
29  
30  
31  
32  
33  
34  
35  
36  
37  
38  
39  
40  
41  
42  
43  
44  
45  
46  
47  
48  
49  
50  
51  
52  
53  
54  
55  
56  
57  
58  
59  
60

1  
2  
3  
4  
5  
6  
7  
8  
9  
10  
11  
12  
13  
14  
15  
16  
17  
18  
19  
20  
21  
22  
23  
24  
25  
26  
27  
28  
29  
30  
31  
32  
33  
34  
35  
36  
37  
38  
39  
40  
41  
42  
43  
44  
45  
46  
47  
48  
49  
50  
51  
52  
53  
54  
55  
56  
57  
58  
59  
60

## The role of organisational and cultural factors in the implementation of system-wide interventions in acute hospitals to improve patient outcomes: a systematic literature review

**Authors:**

|                                                                        |
|------------------------------------------------------------------------|
| <b>Hadis Nosrati, PhD</b><br>Research Fellow <sup>1</sup>              |
| <b>Robyn Clay-Williams, PhD</b><br>Research Fellow <sup>2</sup>        |
| <b>Frances Cunningham, ScD</b><br>Senior Research Fellow <sup>2</sup>  |
| <b>Ken Hillman,</b><br>Professor and Director <sup>1</sup>             |
| <b>Jeffrey Braithwaite, PhD</b><br>Professor and Director <sup>2</sup> |

**Affiliations:**

|                                                                                                                                                      |
|------------------------------------------------------------------------------------------------------------------------------------------------------|
| 1 The Simpson Centre for Health Services Research<br>Australian Institute of Health Innovation<br>University of New South Wales<br>Sydney, Australia |
| 2 Centre for Clinical Governance Research<br>Australian Institute of Health Innovation<br>University of New South Wales<br>Sydney, Australia         |

**Contact details of corresponding author:**

|                                                                                                                                                 |
|-------------------------------------------------------------------------------------------------------------------------------------------------|
| <b>Dr Robyn Clay-Williams</b>                                                                                                                   |
| <b>Business:</b> + 614 2158 2638                                                                                                                |
| <b>Fax:</b> + 612 9663 8692                                                                                                                     |
| <b>Mobile:</b> + 614 2158 2638                                                                                                                  |
| <b>Email:</b> r.clay-williams@unsw.edu.au                                                                                                       |
| <b>Address:</b> Australian Institute of Health Innovation<br>Faculty of Medicine<br>University of New South Wales<br>Sydney NSW 2052, Australia |

**Keywords:**

|                                                                                            |
|--------------------------------------------------------------------------------------------|
| Organisational culture, hospital-wide intervention, patient outcomes, acute care hospitals |
|--------------------------------------------------------------------------------------------|

**Manuscript data:**

|                               |
|-------------------------------|
| <b>Words in abstract:</b> 300 |
| <b>Words in body:</b> 1287    |
| <b>Tables:</b> 0              |
| <b>Figures:</b> 1             |
| <b>References:</b> 18         |

**Statements:**

|                                                                                                                                                                                                                                           |
|-------------------------------------------------------------------------------------------------------------------------------------------------------------------------------------------------------------------------------------------|
| <b>Funding:</b> This research is supported under the NSW Department of Health Capacity Building Infrastructure Program, Projects scheme (project RG093684) and National Health and Medical Research Council (NHMRC) program grant 568612. |
| <b>Conflict of interest:</b> The authors have no conflict of interest to declare.                                                                                                                                                         |
| <b>Contributorship:</b> All authors contributed to the design, drafting and revision of the paper, and approved the final version to be published.                                                                                        |
| <b>Data sharing:</b> Data available on request from the corresponding author.                                                                                                                                                             |

1  
2  
3 **The role of organisational and cultural factors in the implementation of system-wide**  
4  
5 **interventions in acute hospitals to improve patient outcomes: a systematic literature review**  
6  
7

8  
9 **ABSTRACT**  
10

11 **Introduction:** Little is known about the role of organisational culture in the success and  
12 sustainability of the hospital-wide interventions, and how local culture affects patient outcomes  
13 in acute hospitals.  
14  
15  
16  
17

18 **Methods and analysis:** A systematic literature review will be conducted to identify  
19 organisational factors influencing hospital-wide interventions and patient outcomes. A search of  
20 English language articles will be performed in MEDLINE, CINAHL, EMBASE, Web of  
21 Science, PsychInfo and Global Health databases using Medical Subject Headings and keywords.  
22  
23 Randomised controlled trials, quasi-randomised trials, controlled before and after design studies  
24 and interrupted time-series analysis studies will be included. ‘Grey literature’ will be excluded,  
25 however peer reviewed journals that are likely to publish relevant studies (JAMA, BMJ, BMJ  
26 Quality and Safety, [Lancet](#), New England Journal of Medicine and Implementation Science) will  
27 be hand searched for the last five years. Two reviewers independently will undertake a title and  
28 abstract review using inclusion and exclusion criteria. Studies will be excluded only after  
29 discussion between at least two reviewers, who will assess and agree on the inclusion, risk of  
30 bias and quality rating of the studies. One author will extract summary descriptive data from  
31 these studies; the second author will review this documentation for accuracy and completeness. It  
32 is likely that the studies will be heterogeneous in nature, therefore a narrative synthesis of the  
33 findings will be conducted. We will discuss characteristics of the studies and stratify the results  
34 according to the type of hospital-wide interventions, organisational factors associated with them  
35 and outcomes measured.  
36  
37  
38  
39  
40  
41  
42  
43  
44  
45  
46  
47  
48  
49  
50  
51  
52  
53  
54  
55  
56  
57  
58  
59  
60



1  
2  
3 **Ethics and dissemination:** Findings will be reported via peer-reviewed publications, conference  
4 and seminar presentations. The PRISMA checklist will be applied. No ethics approval was  
5  
6 required, as this is a literature review only. The protocol has been registered in the international  
7  
8 prospective register of systematic reviews, PROSPERO (Registration No: CRD42013003050).  
9  
10  
11  
12  
13  
14  
15  
16  
17  
18  
19  
20  
21  
22  
23  
24  
25  
26  
27  
28  
29  
30  
31  
32  
33  
34  
35  
36  
37  
38  
39  
40  
41  
42  
43  
44  
45  
46  
47  
48  
49  
50  
51  
52  
53  
54  
55  
56  
57  
58  
59  
60

**ARTICLE SUMMARY****Article focus**

- This review aims to identify the organisational factors that affect the implementation of hospital-wide interventions in acute hospitals, and how these organisational factors and hospital-wide interventions influence patient outcomes.

**Key messages**

- Silos, or vertical structures within hospitals such as wards, units, and departments, are well developed in acute care hospitals, but the system may fail at the intersection between silos for patients with complications of the original illness, which are outside the expertise of the admitting clinician.
- To bridge these intersections and thereby reduce the potential preventable adverse events for an increasingly aged and ill hospital population with comorbidities, organisation-wide patient safety interventions are becoming a major focus of health care delivery.
- Little is known about the cultural and organisational determinants of hospital-wide interventions and their effects on patient outcomes.

**Strengths and limitations of this project**

- This study aims to increase our knowledge of organisational culture, which we believe is an important element in the success or failure of the implementation of hospital-wide interventions.
- We will investigate how the adoption of a system-wide intervention can affect patient outcomes.

- 1
- 2
- 3
- 4
- 5
- 6
- 7
- 8
- 9
- 10
- 11
- 12
- 13
- 14
- 15
- 16
- 17
- 18
- 19
- 20
- 21
- 22
- 23
- 24
- 25
- 26
- 27
- 28
- 29
- 30
- 31
- 32
- 33
- 34
- 35
- 36
- 37
- 38
- 39
- 40
- 41
- 42
- 43
- 44
- 45
- 46
- 47
- 48
- 49
- 50
- 51
- 52
- 53
- 54
- 55
- 56
- 57
- 58
- 59
- 60
- We will be including observational studies as well as controlled before and after studies in the systematic review, as it is likely they will provide valuable information.
- We include only English language studies.
- Risk of bias ~~may occur by inclusion of non-randomised studies, but we will mitigate this risk by only accepting papers with high quality evidence and validated data~~ will be assessed using standard Cochrane criteria.

## INTRODUCTION

Despite the remarkable advances in healthcare delivery and considerable changes in hospital patient populations and expectations associated with modern medicine, the fundamental organisation of hospitals has changed little into the twenty first century. The system is constructed around the admitting doctor and patient relationship.<sup>1</sup> In acute hospitals, wards are able to manage the day-to-day aspects of a patient's condition, but the system can fail when the patient's condition deteriorates and the admitting doctor no longer has the skills or knowledge to neither recognise nor manage the deteriorating patient.<sup>1-3</sup> One of the first organisation wide and patient centred systems, known as the Medical Emergency Team (MET) or Rapid Response System (RRS) has been implemented in many hospitals around the world to address this situation.<sup>4 5</sup> When the criteria that define an at-risk or deteriorating patient are met, a team of clinicians with appropriate skills urgently responds to the patient. However, because of the nature of hospitals, and depending on the existence of necessary infrastructure to provide the continuity of care,<sup>2</sup> the effectiveness of the few-implemented hospital-wide interventions, such as an RRS, varies significantly from one health organisation to another.<sup>6</sup> Ultimately, we are interested in determining why interventions such as MET are successful in some settings but not in others. By examining hospital-wide interventions in acute care systems (including non-MET interventions) via this systematic literature review, we hope to shed some light on the problem.

While there is keen interest in how to optimise and implement the system, little is known about the role of organisational culture<sup>7-10</sup> in the success and sustainability of the hospital-wide interventions, and how the culture could affect patient outcomes in acute hospitals. Patient safety interventions working at an organisational level that include participative principles, such as the involvement of workers in design and implementation, may provide the greatest hope of

1  
2  
3 improving patient safety.<sup>11-13</sup> We note the identification of limitations in the literature such as  
4 those identified by Kaplan et al. 2010,<sup>14</sup> including the lack of a practical conceptual model, the  
5 lack of clear definitions of contextual factors and the lack of well-specified measures. This  
6 protocol details the processes of a systematic literature review that aims to identify the  
7 organisational and cultural factors<sup>10 15</sup> affecting the adoption and success of hospital-wide  
8 interventions in acute hospitals, and to assess the effects of those factors on patient outcomes.  
9

## 17 METHODS AND ANALYSIS

### 20 Search Strategy

21 We will search MEDLINE, CINAHL, EMBASE, Web of Science, PsychInfo, Global Health,  
22 using Medical Subject Headings and keywords, from 1946, 1991, 1947, 1934, 1967, 1910,  
23 respectively to September 2012. The general search strategy is shown in Box 1 and the subject  
24 heading will be adjusted for each database. We will use multiple terms to identify culture and  
25 intervention. The search will be restricted to English language articles (the authors do not have  
26 resources for translation) and we will hand search the journals, JAMA, BMJ, BMJ Quality and  
27 Safety, [Lancet](#), New England Journal of Medicine and Implementation Science, separately for  
28 the last five years (from 2007-2012). The peer reviewed journals were chosen as the most likely  
29 to publish studies that meet inclusion criteria, in particular validated patient outcomes. Although  
30 PLOS Medicine and BMJ Open are also likely to publish studies that meet our criteria, both are  
31 open access online journals with all articles linked to PubMed at time of publication, therefore  
32 we expect that the online search engines will capture relevant papers from these journals. We  
33 will also hand search the reference lists of the relevant Cochrane systematic reviews.  
34  
35  
36  
37  
38  
39  
40  
41  
42  
43  
44  
45  
46  
47  
48  
49  
50  
51  
52  
53  
54

### 55 Box 1. General search strategy

1. Organisational culture OR organisational climate OR organisational context OR organisational characteristics OR workplace culture OR organisational goal OR organisational value
2. AND [(adopting organisation) OR (adherence to protocol) OR (organisational innovation) OR (diffusion of innovation) OR (intervention) OR (diffusion) OR (organisational change) OR (protocol change) OR (practice change) OR (structure change) OR (adoption) OR (leadership)]
3. AND (patient outcome)
4. AND [healthcare organisation OR hospital OR healthcare facility]

### Study Selection and exclusion criteria

Under the review's inclusion and exclusion criteria, research must focus on a hospital-wide intervention, i.e., mere implementation in the operation theatre, a few general units or ICU is not sufficient. Other inclusion criteria include investigating the organisational factors that may affect the implementation. Studies should also provide patient outcome data before and after the hospital-wide intervention. The review will only include interventions in an acute care setting, i.e., rehabilitation centres, primary health cares, ambulatory services, and psychiatric facilities will be excluded. Other inclusion criteria include that the study report on empirical research, in peer reviewed, English language, scholarly journals, and that abstract and full text are available. The 'grey literature' will be excluded as it is unlikely to yield study designs that meet inclusion criteria.

We will not limit our search to randomised controlled trial studies, since we believe observational studies and controlled before and after studies -- with validated data about patient outcomes -- can provide useful information to identify the organisational and cultural determinants of hospital-wide interventions.

References identified in the search will be reviewed for inclusion by two researchers. Studies will be excluded only after discussion between at least two reviewers, who will assess and agree

1  
2  
3 on the inclusion and quality rating of the studies. All papers excluded by consensus will be  
4 depicted in a document explaining reason for exclusion. This process will be conducted  
5 according to the Preferred Reporting Items for Systematic Reviews and Meta-Analyses  
6 (PRISMA) guidelines<sup>16 17</sup> and literature selection will be presented in a PRISMA flow chart.<sup>16</sup>  
7  
8 The selection criteria may limit the generalisability of study findings, however the scope of the  
9 search is appropriate to identify the majority of articles published in the peer review literature  
10 and meeting the study criteria.  
11  
12  
13  
14  
15  
16  
17  
18  
19

### 20 **Participants**

21  
22 Participating hospitals may include any acute care facility, including metropolitan or rural, and  
23 private or public hospitals.  
24  
25  
26  
27  
28

### 29 **Type of interventions**

30  
31 As noted, we will only include interventions that are hospital-wide and are associated with  
32 patient outcomes through validated data collected before and after implementation of the  
33 intervention. Also, the organisational elements of the intervention should have been explained in  
34 the study to make it qualified for our review.  
35  
36  
37  
38  
39  
40  
41

### 42 **Comparisons**

43  
44 Comparisons may include acute hospitals with similar nursing-patient ratio, size and region with  
45 no intervention.  
46  
47  
48  
49

### 50 **Types of outcome measures**

51  
52 Patient outcomes may include mortality rate, the rate of adverse events, patient satisfaction, and  
53 infection rate.  
54  
55  
56  
57  
58  
59  
60

### Assessment of risk of bias

Two reviewers will independently assess risk of bias in eligible studies as outlined in the Cochrane Handbook for Systematic Reviews:<sup>18</sup> selective outcome reporting, and blinding of the research personnel to data collection and analysis. For any non-randomised trials included in the review, the authors will assess any selection bias that may lead to confounding of the outcome. Disagreement regarding assessment of risk of bias will be resolved through discussion between two reviewers. If consensus is not reached, a third reviewer will be consulted.

### Data Collection and Analysis

Using a standard form created for the review, one author will extract summary descriptive data from these studies. The same author will compile a tabular presentation the study participants and setting, objective, design and method, type of hospital-wide intervention, organisational/cultural factors, patient/process outcomes, and findings. The second author will independently review this documentation for accuracy and completeness.

### Strategy for data synthesis

If suitable data are available, a meta-analysis will be completed; however it is likely that included studies will be heterogeneous in nature. Where trial data cannot be combined, two of the authors will conduct a narrative synthesis of the findings in accordance with the review objectives. We will discuss characteristics of the studies and stratify the results according to the type of hospital-wide interventions, organisational factors associated with them, and outcomes measured. We anticipate that we will not be able to use a quality assessment tool to formally assess the quality of the studies due to their heterogeneous nature.

### Limitations



The review findings will be limited by the number and quality of studies identified by the search strategy. In particular, limiting the hand search to restricted access general medicine publications that are likely to publish studies with validated patient outcomes places reliance on the search engines to deliver relevant papers from open access online publications such as BMJ Open and PLOS Medicine.

## **ETHICS AND DISSEMINATION**

Ethics is not required given the protocol is a systematic literature review. The findings of this review will be disseminated through mechanisms including peer-reviewed publications and conference presentations. The PRISMA checklist<sup>16</sup> will be used for writing the final review.

**ACKNOWLEDGEMENTS:** We acknowledge Dr. Isla Hains from the Centre for Health Systems and Safety Research in the Australian Institute of Health Innovation who provided guidance regarding the search strategy.

**COMPETING INTERESTS:** The authors have no conflict of interest to declare.

**AUTHORS' CONTRIBUTIONS:** All authors contributed to the design, drafting and revision of the paper, and approved the final version to be published.

## REFERENCES

1. Hillman K, Chen J, Young L. The Evolution of the Health Care System. In: DeVita MA, Hillman K, Bellomo R, editors. *Medical Emergency Teams*: Springer New York, 2006:18-23.
2. Hillman K, Chen J, Aneman A. Continuum of hospital care: the role of intensive care. *Curr Opin Crit Care* 2010;16(5):505-09.
3. Hillman KM. Restructuring hospital services. *Med J Australia* 1998;169(5):239-39.
4. Hillman K, Parr M, Flabouris A, Bishop G, Stewart A. Redefining in-hospital resuscitation: the concept of the medical emergency team. *Resuscitation* 2001;48(2):105-10.
5. Sakai T, Devita MA. Rapid response system. *Journal of anesthesia* 2009;23(3):403-8.
6. Hillman K, Chen J, Cretikos M, Bellomo R, Brown D, Doig G, et al. Introduction of the medical emergency team (MET) system: a cluster-randomised controlled trial. *Lancet* 2005;365(9477):2091-7.
7. Braithwaite J. A lasting legacy from Tony Blair? NHS culture change. *JRSM* 2011;104(2):87-89.
8. Braithwaite J, Hyde P, Pope C. *Culture and climate in health care organizations*: Palgrave Macmillan, 2010.
9. Mannion R, Davies H, Harrison S, Konteh F, Greener I, McDonald R. Quantitative explorations of culture and performance relationship. *Changing organisational cultures and hospital performance in the NHS*. Birmingham, England: National Institute for Health Research, Service Delivery and Organisation Programme, 2010:42-72.
10. Mannion R, Davis H, Harrison S, Frederick K, Jacobs R, Walshe K. Changing Management Cultures in the English National Health Service. In: Braithwaite J, Hyde P, Pope C, editors. *Culture and Climate in Health Care Organisations*: palgrave macmillan, 2010:19-30.
11. Grayson ML, Russo PL, Crulckshank M, Bear JL, Gee CA, Hughes CF, et al. Outcomes from the first 2 years of the Australian National Hand Hygiene Initiative. *Med J Australia* 2011;195(10):615-19.
12. Larson EL, Early E, Cloonan P, Sugrue S, Parides M. An organizational climate intervention associated with increased handwashing and decreased nosocomial infections. *Behav Med* 2000;26(1):14-22.
13. Braithwaite J, Coiera E. Beyond patient safety Flatland. *Journal of the Royal Society of Medicine* 2010;103(6):219-25.

- 1  
2  
3  
4  
5  
6  
7  
8  
9  
10  
11  
12  
13  
14  
15  
16  
17  
18  
19  
20  
21  
22  
23  
24  
25  
26  
27  
28  
29  
30  
31  
32  
33  
34  
35  
36  
37  
38  
39  
40  
41  
42  
43  
44  
45  
46  
47  
48  
49  
50  
51  
52  
53  
54  
55  
56  
57  
58  
59  
60
14. Kaplan HC, Brady PW, Dritz MC, Hooper DK, Linam W, Froehle CM, et al. The influence of context on quality improvement success in health care: a systematic review of the literature. *Milbank Quarterly* 2010;88(4):500-59.
15. Cameron KS, Freeman SJ. Cultural congruence, strength, and type: Relationships to effectiveness. *Research in organizational change and development* 1991;5(1):23-58.
16. Liberati A, Altman DG, Tetzlaff J, Mulrow C, Gotzsche PC, Ioannidis JP, et al. The PRISMA statement for reporting systematic reviews and meta-analyses of studies that evaluate healthcare interventions: explanation and elaboration. *BMJ* 2009;339:b2700.
17. Moher D, Liberati A, Tetzlaff J, Altman DG. Preferred reporting items for systematic reviews and meta-analyses: the PRISMA statement. *BMJ* 2009;339:b2535.
18. Higgins J, Green S, Editors. Cochrane Handbook for Systematic Reviews of Interventions. *The Cochrane Library* 2005(3).



**The role of organisational and cultural factors in the implementation of system-wide interventions in acute hospitals to improve patient outcomes: protocol for a systematic literature review**

|                                 |                                                                                                                                                                                                                                                                                                                                                                                                                                                                                   |
|---------------------------------|-----------------------------------------------------------------------------------------------------------------------------------------------------------------------------------------------------------------------------------------------------------------------------------------------------------------------------------------------------------------------------------------------------------------------------------------------------------------------------------|
| Journal:                        | <i>BMJ Open</i>                                                                                                                                                                                                                                                                                                                                                                                                                                                                   |
| Manuscript ID:                  | bmjopen-2012-002268.R3                                                                                                                                                                                                                                                                                                                                                                                                                                                            |
| Article Type:                   | Protocol                                                                                                                                                                                                                                                                                                                                                                                                                                                                          |
| Date Submitted by the Author:   | 01-Feb-2013                                                                                                                                                                                                                                                                                                                                                                                                                                                                       |
| Complete List of Authors:       | Nosrati, Hadis; The Simpson Centre for Health Services Research, University of New South Wales<br>Clay-Williams, Robyn; Centre for Clinical Governance Research, University of New South Wales<br>Cunningham, Frances; University of NSW, Centre for Clinical Governance Research<br>Hillman, Ken; The Simpson Centre for Health Services Research, University of New South Wales<br>Braithwaite, Jeffrey; Centre for Clinical Governance Research, University of New South Wales |
| <b>Primary Subject Heading</b>: | Health services research                                                                                                                                                                                                                                                                                                                                                                                                                                                          |
| Secondary Subject Heading:      | Evidence based practice                                                                                                                                                                                                                                                                                                                                                                                                                                                           |
| Keywords:                       | health service research, Performance measures, Healthcare quality improvement                                                                                                                                                                                                                                                                                                                                                                                                     |
|                                 |                                                                                                                                                                                                                                                                                                                                                                                                                                                                                   |

SCHOLARONE™  
Manuscripts

**The role of organisational and cultural factors in the implementation of system-wide interventions in acute hospitals to improve patient outcomes: a systematic literature review**

**Authors:**

|                                                                        |
|------------------------------------------------------------------------|
| <b>Hadis Nosrati, PhD</b><br>Research Fellow <sup>1</sup>              |
| <b>Robyn Clay-Williams, PhD</b><br>Research Fellow <sup>2</sup>        |
| <b>Frances Cunningham, ScD</b><br>Senior Research Fellow <sup>2</sup>  |
| <b>Ken Hillman,</b><br>Professor and Director <sup>1</sup>             |
| <b>Jeffrey Braithwaite, PhD</b><br>Professor and Director <sup>2</sup> |

**Affiliations:**

1 The Simpson Centre for Health Services Research  
Australian Institute of Health Innovation  
University of New South Wales  
Sydney, Australia  
2 Centre for Clinical Governance Research  
Australian Institute of Health Innovation  
University of New South Wales  
Sydney, Australia

**Contact details of corresponding author:**

|                                                                                                                                                 |
|-------------------------------------------------------------------------------------------------------------------------------------------------|
| <b>Dr Robyn Clay-Williams</b>                                                                                                                   |
| <b>Business:</b> + 614 2158 2638                                                                                                                |
| <b>Fax:</b> + 612 9663 8692                                                                                                                     |
| <b>Mobile:</b> + 614 2158 2638                                                                                                                  |
| <b>Email:</b> r.clay-williams@unsw.edu.au                                                                                                       |
| <b>Address:</b> Australian Institute of Health Innovation<br>Faculty of Medicine<br>University of New South Wales<br>Sydney NSW 2052, Australia |

**Keywords:**

Organisational culture, hospital-wide intervention, patient outcomes, acute care hospitals

**Manuscript data:**

**Words in abstract:** 300  
**Words in body:** 1287  
**Tables:** 0  
**Figures:** 1  
**References:** 18

**Statements:**

**Funding:** This research is supported under the NSW Department of Health Capacity Building Infrastructure Program, Projects scheme (project RG093684) and National Health and Medical Research Council (NHMRC) program grant 568612.

**Conflict of interest:** The authors have no conflict of interest to declare.

**Contributorship:** All authors contributed to the design, drafting and revision of the paper, and approved the final version to be published.

**Data sharing:** Data available on request from the corresponding author.

1  
2  
3 **The role of organisational and cultural factors in the implementation of system-wide**  
4 **interventions in acute hospitals to improve patient outcomes: a systematic literature review**  
5  
6  
7

8 **ABSTRACT**  
9

10  
11 **Introduction:** Little is known about the role of organisational culture in the success and  
12 sustainability of the hospital-wide interventions, and how local culture affects patient outcomes  
13 in acute hospitals.  
14  
15  
16

17  
18 **Methods and analysis:** A systematic literature review will be conducted to identify  
19 organisational factors influencing hospital-wide interventions and patient outcomes. A search of  
20 English language articles will be performed in MEDLINE, CINAHL, EMBASE, Web of  
21 Science, PsychInfo and Global Health databases using Medical Subject Headings and keywords.  
22  
23  
24  
25  
26  
27  
28  
29  
30  
31  
32  
33  
34  
35  
36  
37  
38  
39  
40  
41  
42  
43  
44  
45  
46  
47  
48  
49  
50  
51  
52  
53  
54  
55  
56  
57  
58  
59  
60

Randomised controlled trials, quasi-randomised trials, controlled before and after design studies and interrupted time-series analysis studies will be included. ‘Grey literature’ will be excluded, however peer reviewed journals that are likely to publish relevant studies (JAMA, BMJ, BMJ Quality and Safety, Lancet, New England Journal of Medicine and Implementation Science) will be hand searched for the last five years. Two reviewers independently will undertake a title and abstract review using inclusion and exclusion criteria. Studies will be excluded only after discussion between at least two reviewers, who will assess and agree on the inclusion, risk of bias and quality rating of the studies. One author will extract summary descriptive data from these studies; the second author will review this documentation for accuracy and completeness. It is likely that the studies will be heterogeneous in nature, therefore a narrative synthesis of the findings will be conducted. We will discuss characteristics of the studies and stratify the results according to the type of hospital-wide interventions, organisational factors associated with them and outcomes measured.

1  
2  
3 **Ethics and dissemination:** Findings will be reported via peer-reviewed publications, conference  
4 and seminar presentations. The PRISMA checklist will be applied. No ethics approval was  
5  
6 required, as this is a literature review only. The protocol has been registered in the international  
7  
8 prospective register of systematic reviews, PROSPERO (Registration No: CRD42013003050).  
9  
10  
11  
12  
13  
14  
15  
16  
17  
18  
19  
20  
21  
22  
23  
24  
25  
26  
27  
28  
29  
30  
31  
32  
33  
34  
35  
36  
37  
38  
39  
40  
41  
42  
43  
44  
45  
46  
47  
48  
49  
50  
51  
52  
53  
54  
55  
56  
57  
58  
59  
60

For peer review only

## ARTICLE SUMMARY

### Article focus

- This review aims to identify the organisational factors that affect the implementation of hospital-wide interventions in acute hospitals, and how these organisational factors and hospital-wide interventions influence patient outcomes.

### Key messages

- Silos, or vertical structures within hospitals such as wards, units, and departments, are well developed in acute care hospitals, but the system may fail at the intersection between silos for patients with complications of the original illness, which are outside the expertise of the admitting clinician.
- To bridge these intersections and thereby reduce the potential preventable adverse events for an increasingly aged and ill hospital population with comorbidities, organisation-wide patient safety interventions are becoming a major focus of health care delivery.
- Little is known about the cultural and organisational determinants of hospital-wide interventions and their effects on patient outcomes.

### Strengths and limitations of this project

- This study aims to increase our knowledge of organisational culture, which we believe is an important element in the success or failure of the implementation of hospital-wide interventions.
- We will investigate how the adoption of a system-wide intervention can affect patient outcomes.



- We will be including observational studies as well as controlled before and after studies in the systematic review, as it is likely they will provide valuable information.
- We include only English language studies.
- Risk of bias will be assessed using standard Cochrane criteria.

For peer review only

## INTRODUCTION

Despite the remarkable advances in healthcare delivery and considerable changes in hospital patient populations and expectations associated with modern medicine, the fundamental organisation of hospitals has changed little into the twenty first century. The system is constructed around the admitting doctor and patient relationship.<sup>1</sup> In acute hospitals, wards are able to manage the day-to-day aspects of a patient's condition, but the system can fail when the patient's condition deteriorates and the admitting doctor no longer has the skills or knowledge to neither recognise nor manage the deteriorating patient.<sup>1-3</sup> One of the first organisation wide and patient centred systems, known as the Medical Emergency Team (MET) or Rapid Response System (RRS) has been implemented in many hospitals around the world to address this situation.<sup>2</sup> When the criteria that define an at-risk or deteriorating patient are met, a team of clinicians with appropriate skills urgently responds to the patient. However, because of the nature of hospitals, and depending on the existence of necessary infrastructure to provide the continuity of care,<sup>4 5</sup> the effectiveness of the few-implemented hospital-wide interventions, such as an RRS, varies significantly from one health organisation to another.<sup>6</sup> Ultimately, we are interested in determining why interventions such as MET are successful in some settings but not in others. By examining hospital-wide interventions in acute care systems (including non-MET interventions) via this systematic literature review, we hope to shed some light on the problem.

While there is keen interest in how to optimise and implement the system, little is known about the role of organisational culture<sup>7-10</sup> in the success and sustainability of the hospital-wide interventions, and how the culture could affect patient outcomes in acute hospitals. Patient safety interventions working at an organisational level that include participative principles, such as the involvement of workers in design and implementation, may provide the greatest hope of

1  
2  
3 improving patient safety.<sup>11-13</sup> We note the identification of limitations in the literature such as  
4 those identified by Kaplan et al. 2010,<sup>14</sup> including the lack of a practical conceptual model, the  
5 lack of clear definitions of contextual factors and the lack of well-specified measures. This  
6 protocol details the processes of a systematic literature review that aims to identify the  
7 organisational and cultural factors<sup>9 15</sup> affecting the adoption and success of hospital-wide  
8 interventions in acute hospitals, and to assess the effects of those factors on patient outcomes.  
9

## 17 **METHODS AND ANALYSIS**

### 20 **Search Strategy**

21  
22 We will search MEDLINE, CINAHL, EMBASE, Web of Science, PsychInfo, Global Health,  
23 using Medical Subject Headings and keywords, from 1946, 1991, 1947, 1934, 1967, 1910,  
24 respectively to September 2012. The general search strategy is shown in Box 1 and the subject  
25 heading will be adjusted for each database. We will use multiple terms to identify culture and  
26 intervention. The search will be restricted to English language articles (access to translation  
27 services is not available for the review), however we note that a recent systematic review of  
28 empirical studies on the effect of English-language restriction on systematic reviews found "no  
29 evidence overall of a systematic bias from the use of language restrictions in systematic review-  
30 based meta-analyses in conventional medicine."<sup>16</sup> In addition to searching the specified  
31 databases, to check that the database searches have not missed any studies that may be relevant  
32 to our review we will hand search the journals, JAMA, BMJ, BMJ Quality and Safety, Lancet,  
33 New England Journal of Medicine and Implementation Science, separately for the last five years  
34 (from 2007-2012). The topic of hospital-wide interventions is broad and complex, and it is  
35 possible that relevant articles may be classified differently to the review search terms. The hand  
36 search will serve to check that our search criteria are broad enough, and that an extension of the  
37  
38  
39  
40  
41  
42  
43  
44  
45  
46  
47  
48  
49  
50  
51  
52  
53  
54  
55  
56  
57  
58  
59  
60

1  
2  
3 search criteria is not required. These peer-reviewed journals were chosen as the most likely to  
4  
5 publish studies that meet the inclusion criteria, in particular, validated patient outcomes. We will  
6  
7 also hand search the reference lists of the relevant Cochrane systematic reviews. Two researchers  
8  
9 will conduct the hand search; if disagreement about inclusion of a study occurs a third researcher  
10  
11 will arbitrate.  
12  
13

### 14 15 16 **Box 1. General search strategy**

- |                                                                                                                                                                                                                                                                      |                                                                                                                                                                                                                                                                                                                                                                                                                                                                                                                                                                                                                                            |
|----------------------------------------------------------------------------------------------------------------------------------------------------------------------------------------------------------------------------------------------------------------------|--------------------------------------------------------------------------------------------------------------------------------------------------------------------------------------------------------------------------------------------------------------------------------------------------------------------------------------------------------------------------------------------------------------------------------------------------------------------------------------------------------------------------------------------------------------------------------------------------------------------------------------------|
| 17<br>18<br>19<br>20<br>21<br>22<br>23<br>24<br>25<br>26<br>27<br>28<br>29<br>30<br>31<br>32<br>33<br>34<br>35<br>36<br>37<br>38<br>39<br>40<br>41<br>42<br>43<br>44<br>45<br>46<br>47<br>48<br>49<br>50<br>51<br>52<br>53<br>54<br>55<br>56<br>57<br>58<br>59<br>60 | <ol style="list-style-type: none"><li>1. Organisational culture OR organisational climate OR organisational context OR organisational characteristics OR workplace culture OR organisational goal OR organisational value</li><li>2. AND [(adopting organisation) OR (adherence to protocol) OR (organisational innovation) OR (diffusion of innovation) OR (intervention) OR (diffusion) OR (organisational change) OR (protocol change) OR (practice change) OR (structure change) OR (adoption) OR (leadership)]</li><li>3. AND (patient outcome)</li><li>4. AND [healthcare organisation OR hospital OR healthcare facility]</li></ol> |
|----------------------------------------------------------------------------------------------------------------------------------------------------------------------------------------------------------------------------------------------------------------------|--------------------------------------------------------------------------------------------------------------------------------------------------------------------------------------------------------------------------------------------------------------------------------------------------------------------------------------------------------------------------------------------------------------------------------------------------------------------------------------------------------------------------------------------------------------------------------------------------------------------------------------------|

### 32 **Study Selection and exclusion criteria**

33  
34 Under the review's inclusion and exclusion criteria, research must focus on a hospital-wide  
35  
36 intervention, i.e., mere implementation in the operation theatre, a few general units or ICU is not  
37  
38 sufficient. Other inclusion criteria include investigating the organisational factors that may affect  
39  
40 the implementation. Studies should also provide patient outcome data before and after the  
41  
42 hospital-wide intervention. The review will only include interventions in an acute care setting,  
43  
44 i.e., rehabilitation centres, primary health cares, ambulatory services, and psychiatric facilities  
45  
46 will be excluded. Other inclusion criteria include that the study report on empirical research, in  
47  
48 peer reviewed, English language, scholarly journals, and that abstract and full text are available.  
49  
50 The 'grey literature' will be excluded as it is unlikely to yield study designs that meet inclusion  
51  
52  
53  
54  
55  
56  
57  
58  
59  
60 criteria.

1  
2  
3 We will not limit our search to randomised controlled trial studies, since we believe  
4 observational studies and controlled before and after studies -- with validated data about patient  
5 outcomes -- can provide useful information to identify the organisational and cultural  
6 determinants of hospital-wide interventions.  
7  
8  
9  
10

11  
12  
13 References identified in the search will be reviewed for inclusion by two researchers. Studies  
14 will be excluded only after discussion between at least two reviewers, who will assess and agree  
15 on the inclusion and quality rating of the studies. The methodological quality of the reported  
16 research will be assessed in accordance with Cochrane Collaboration guidelines.<sup>17</sup> The quality of  
17 the reporting of the identified studies will be assessed using appropriate critical appraisal tools,  
18 such as CONSolidated Standards of Reporting Trials (CONSORT),<sup>18</sup> Strengthening the Reporting  
19 of Observational Studies in Epidemiology (STROBE)<sup>19</sup> or Preferred Reporting Items for  
20 Systematic Reviews and Meta-Analyses (PRISMA).<sup>20</sup> All papers excluded by consensus will be  
21 depicted in a document explaining reason for exclusion. Our review will be conducted according  
22 to PRISMA guidelines<sup>20 21</sup> and literature selection will be presented in a PRISMA flow chart.<sup>20</sup>  
23  
24  
25  
26  
27  
28  
29  
30  
31  
32  
33  
34  
35  
36  
37  
38  
39  
40  
41  
42  
43  
44  
45  
46  
47  
48  
49  
50  
51  
52  
53  
54  
55  
56  
57  
58  
59  
60

### **Participants**

Participating hospitals may include any acute care facility, including metropolitan or rural, and private or public hospitals.

### **Type of interventions**

1  
2  
3 As noted, we will only include interventions that are hospital-wide and are associated with  
4 patient outcomes through validated data collected before and after implementation of the  
5 intervention. Also, the organisational elements of the intervention should have been explained in  
6 the study to make it qualified for our review.  
7  
8  
9  
10  
11

### 12 13 **Comparisons**

14  
15 Comparisons may include acute hospitals with similar nursing-patient ratio, size and region with  
16 no intervention.  
17  
18  
19  
20

### 21 22 **Types of outcome measures**

23  
24 Patient outcomes may include mortality rate, the rate of adverse events, patient satisfaction, and  
25 infection rate.  
26  
27  
28  
29

### 30 31 **Assessment of risk of bias**

32  
33 Two reviewers will independently assess risk of bias in eligible studies as outlined in the  
34 Cochrane Handbook for Systematic Reviews:<sup>17</sup> selective outcome reporting, and blinding of the  
35 research personnel to data collection and analysis. For any non-randomised trials included in the  
36 review, the authors will assess any selection bias that may lead to confounding of the outcome.  
37  
38 Disagreement regarding assessment of risk of bias will be resolved through discussion between  
39 two reviewers. If consensus is not reached, a third reviewer will be consulted.  
40  
41  
42  
43  
44  
45  
46  
47  
48

### 49 50 **Data Collection and Analysis**

51  
52 Using a standard form created for the review, one author will extract summary descriptive data  
53 from these studies. The same author will compile a tabular presentation the study participants  
54 and setting, objective, design and method, type of hospital-wide intervention,  
55  
56  
57  
58  
59  
60

1  
2  
3 organisational/cultural factors, patient/process outcomes, and findings. The second author will  
4  
5 independently review this documentation for accuracy and completeness.  
6  
7  
8

### 9 10 **Strategy for data synthesis**

11  
12 If suitable data are available, a meta-analysis will be completed; however it is likely that  
13  
14 included studies will be heterogeneous in nature. Where trial data cannot be combined, two of  
15  
16 the authors will conduct a narrative synthesis of the findings in accordance with the review  
17  
18 objectives. We will discuss characteristics of the studies and stratify the results according to the  
19  
20 type of hospital-wide interventions, organisational factors associated with them, and outcomes  
21  
22 measured.  
23  
24

### 25 26 **Limitations**

27  
28 The review findings will be limited by the number and quality of studies identified by the search  
29  
30 strategy. A potential limitation is in selection of the search terms. The concept of a ‘hospital-  
31  
32 wide intervention’ is subject to classification, and it is possible that studies could be published  
33  
34 that would meet our inclusion criteria, but are not identified by the search engines due to use of  
35  
36 alternate terms or categorisation. We have attempted to ameliorate this with a hand search over  
37  
38 the last five years of six prominent general medical journals that we believe are likely to publish  
39  
40 studies relevant to our review. The hand searching provides an additional check on the reliability  
41  
42 of the search strategy of the electronic databases and will serve to check that an extension of the  
43  
44 search criteria is not required. By restricting the search to English language articles we are also  
45  
46 potentially eliminating relevant studies from inclusion in our review.  
47  
48  
49  
50  
51

### 52 53 **ETHICS AND DISSEMINATION**

54  
55  
56 Ethics is not required given the protocol is a systematic literature review. The findings of this  
57  
58  
59  
60

1  
2  
3 review will be disseminated through mechanisms including peer-reviewed publications and  
4  
5 conference presentations. The PRISMA checklist<sup>20</sup> will be used for writing the final review.  
6  
7

8  
9 **ACKNOWLEDGEMENTS:** We acknowledge Dr. Isla Hains from the Centre for Health  
10  
11 Systems and Safety Research in the Australian Institute of Health Innovation who provided  
12  
13 guidance regarding the search strategy.  
14

15  
16  
17 **COMPETING INTERESTS:** The authors have no conflict of interest to declare.  
18

19  
20 **AUTHORS' CONTRIBUTIONS:** All authors contributed to the design, drafting and revision  
21  
22 of the paper, and approved the final version to be published.  
23  
24  
25  
26  
27  
28  
29  
30  
31  
32  
33  
34  
35  
36  
37  
38  
39  
40  
41  
42  
43  
44  
45  
46  
47  
48  
49  
50  
51  
52  
53  
54  
55  
56  
57  
58  
59  
60



## REFERENCES

1. Hillman K, Chen J, Young L. The evolution of the health care system. In: DeVita MA, Hillman K, Bellomo R, editors. *Medical Emergency Teams*: Springer New York, 2006:18-23.
2. Hillman K, Chen J, Aneman A. Continuum of hospital care: the role of intensive care. *Current Opinion in Critical Care* 2010;16(5):505-09.
3. Hillman KM. Restructuring hospital services. *Medical Journal of Australia* 1998;169(5):239-39.
4. Hillman K, Parr M, Flabouris A, Bishop G, Stewart A. Redefining in-hospital resuscitation: the concept of the medical emergency team. *Resuscitation* 2001;48(2):105-10.
5. Sakai T, DeVita MA. Rapid response system. *Journal of Anesthesia* 2009;23(3):403-08.
6. Hillman K, Chen J, Cretikos M, Bellomo R, Brown D, Doig G, et al. Introduction of the medical emergency team (MET) system: a cluster-randomised controlled trial. *Lancet* 2005;365(9477):2091-7.
7. Braithwaite J. A lasting legacy from Tony Blair? NHS culture change. *Journal of the Royal Society of Medicine* 2011;104(2):87-89.
8. Braithwaite J, Hyde P, Pope C. *Culture and climate in health care organisations*. Basingstoke, UK: Palgrave Macmillan, 2009.
9. Mannion R, Davies H, Harrison S, Frederick K, Jacobs R, Walshe K. Changing management cultures in the English National Health Service. In: Braithwaite J, Hyde P, Pope C, editors. *Culture and climate in health care organisations*. Basingstoke, UK: Palgrave Macmillan, 2009:19-30.
10. Mannion R, Davies H, Harrison S, Konteh F, Greener I, McDonald R. Quantitative explorations of culture and performance relationship: changing organisational cultures and hospital performance in the NHS. Birmingham, UK: National Institute for Health Research Service Delivery and Organisation Programme, 2010:42-72.
11. Braithwaite J, Coiera E. Beyond patient safety flatland. *Journal of the Royal Society of Medicine* 2010;103(6):219-25.
12. Grayson ML, Russo PL, Cruickshank M, Bear JL, Gee CA, Hughes CF, et al. Outcomes from the first 2 years of the Australian National Hand Hygiene Initiative. *Medical Journal of Australia* 2011;195(10):615-19.
13. Larson EL, Early E, Cloonan P, Sugrue S, Parides M. An organizational climate intervention associated with increased handwashing and decreased nosocomial infections. *Behavioral Medicine* 2000;26(1):14-22.

- 1  
2  
3  
4  
5  
6  
7  
8  
9  
10  
11  
12  
13  
14  
15  
16  
17  
18  
19  
20  
21  
22  
23  
24  
25  
26  
27  
28  
29  
30  
31  
32  
33  
34  
35  
36  
37  
38  
39  
40  
41  
42  
43  
44  
45  
46  
47  
48  
49  
50  
51  
52  
53  
54  
55  
56  
57  
58  
59  
60
14. Kaplan HC, Brady PW, Dritz MC, Hooper DK, Linam W, Froehle CM, et al. The influence of context on quality improvement success in health care: a systematic review of the literature. *Milbank Quarterly* 2010;88(4):500-59.
  15. Cameron K, Freeman S. Culture, congruence, strength and type: relationship to effectiveness research in organizational change and development. *Research in organizational change and development* 1991;5:23-58.
  16. Morrison A, Polisena J, Husereau D, Moulton K, Clark M, Fiander M, et al. The effect of English-language restriction on systematic review-based meta-analyses: a systematic review of empirical studies *International Journal of Technology Assessment in Health Care* 2012;28(02):138-44.
  17. Higgins JPT, Green S, Collaboration C. *Cochrane handbook for systematic reviews of interventions*: Wiley Online Library, 2008.
  18. Schulz KF, Altman DG, Moher D. CONSORT 2010 statement: updated guidelines for reporting parallel group randomised trials. *BMC Medicine* 2010;8(1):18.
  19. Von Elm E, Altman DG, Egger M, Pocock SJ, Gøtzsche PC, Vandenbroucke JP. The Strengthening the Reporting of Observational Studies in Epidemiology (STROBE) statement: guidelines for reporting observational studies. *Preventive Medicine* 2007;45(4):247-51.
  20. Liberati A, Altman DG, Tetzlaff J, Mulrow C, Gøtzsche PC, Ioannidis JPA, et al. Research Methods & Reporting: The PRISMA statement for reporting systematic reviews and meta-analyses of studies that evaluate healthcare interventions: explanation and elaboration. *British Medical Journal* 2009;339:339.
  21. Moher D, Liberati A, Tetzlaff J, Altman DG. Preferred reporting items for systematic reviews and meta-analyses: the PRISMA statement. *PLoS Medicine* 2009;6(7):e1000097.

**The role of organisational and cultural factors in the implementation of system-wide interventions in acute hospitals to improve patient outcomes: a systematic literature review**

**Authors:**

|                                                                        |
|------------------------------------------------------------------------|
| <b>Hadis Nosrati, PhD</b><br>Research Fellow <sup>1</sup>              |
| <b>Robyn Clay-Williams, PhD</b><br>Research Fellow <sup>2</sup>        |
| <b>Frances Cunningham, ScD</b><br>Senior Research Fellow <sup>2</sup>  |
| <b>Ken Hillman,</b><br>Professor and Director <sup>1</sup>             |
| <b>Jeffrey Braithwaite, PhD</b><br>Professor and Director <sup>2</sup> |

**Affiliations:**

1 The Simpson Centre for Health Services Research  
Australian Institute of Health Innovation  
University of New South Wales  
Sydney, Australia  
2 Centre for Clinical Governance Research  
Australian Institute of Health Innovation  
University of New South Wales  
Sydney, Australia

**Contact details of corresponding author:**

|                                                                                                                                                 |
|-------------------------------------------------------------------------------------------------------------------------------------------------|
| <b>Dr Robyn Clay-Williams</b>                                                                                                                   |
| <b>Business:</b> + 614 2158 2638                                                                                                                |
| <b>Fax:</b> + 612 9663 8692                                                                                                                     |
| <b>Mobile:</b> + 614 2158 2638                                                                                                                  |
| <b>Email:</b> r.clay-williams@unsw.edu.au                                                                                                       |
| <b>Address:</b> Australian Institute of Health Innovation<br>Faculty of Medicine<br>University of New South Wales<br>Sydney NSW 2052, Australia |

**Keywords:**

Organisational culture, hospital-wide intervention, patient outcomes, acute care hospitals

**Manuscript data:**

**Words in abstract:** 300  
**Words in body:** 1287  
**Tables:** 0  
**Figures:** 1  
**References:** 18

**Statements:**

**Funding:** This research is supported under the NSW Department of Health Capacity Building Infrastructure Program, Projects scheme (project RG093684) and National Health and Medical Research Council (NHMRC) program grant 568612.

**Conflict of interest:** The authors have no conflict of interest to declare.

**Contributorship:** All authors contributed to the design, drafting and revision of the paper, and approved the final version to be published.

**Data sharing:** Data available on request from the corresponding author.

1  
2  
3 **The role of organisational and cultural factors in the implementation of system-wide**  
4 **interventions in acute hospitals to improve patient outcomes: a systematic literature review**  
5  
6  
7

8 **ABSTRACT**  
9

10  
11 **Introduction:** Little is known about the role of organisational culture in the success and  
12 sustainability of the hospital-wide interventions, and how local culture affects patient outcomes  
13 in acute hospitals.  
14  
15  
16  
17

18 **Methods and analysis:** A systematic literature review will be conducted to identify  
19 organisational factors influencing hospital-wide interventions and patient outcomes. A search of  
20 English language articles will be performed in MEDLINE, CINAHL, EMBASE, Web of  
21 Science, PsychInfo and Global Health databases using Medical Subject Headings and keywords.  
22 Randomised controlled trials, quasi-randomised trials, controlled before and after design studies  
23 and interrupted time-series analysis studies will be included. ‘Grey literature’ will be excluded,  
24 however peer reviewed journals that are likely to publish relevant studies (JAMA, BMJ, BMJ  
25 Quality and Safety, Lancet, New England Journal of Medicine and Implementation Science) will  
26 be hand searched for the last five years. Two reviewers independently will undertake a title and  
27 abstract review using inclusion and exclusion criteria. Studies will be excluded only after  
28 discussion between at least two reviewers, who will assess and agree on the inclusion, risk of  
29 bias and quality rating of the studies. One author will extract summary descriptive data from  
30 these studies; the second author will review this documentation for accuracy and completeness. It  
31 is likely that the studies will be heterogeneous in nature, therefore a narrative synthesis of the  
32 findings will be conducted. We will discuss characteristics of the studies and stratify the results  
33 according to the type of hospital-wide interventions, organisational factors associated with them  
34 and outcomes measured.  
35  
36  
37  
38  
39  
40  
41  
42  
43  
44  
45  
46  
47  
48  
49  
50  
51  
52  
53  
54  
55  
56  
57  
58  
59  
60

1  
2  
3 **Ethics and dissemination:** Findings will be reported via peer-reviewed publications, conference  
4 and seminar presentations. The PRISMA checklist will be applied. No ethics approval was  
5  
6 required, as this is a literature review only. The protocol has been registered in the international  
7  
8 prospective register of systematic reviews, PROSPERO (Registration No: CRD42013003050).  
9  
10  
11  
12  
13  
14  
15  
16  
17  
18  
19  
20  
21  
22  
23  
24  
25  
26  
27  
28  
29  
30  
31  
32  
33  
34  
35  
36  
37  
38  
39  
40  
41  
42  
43  
44  
45  
46  
47  
48  
49  
50  
51  
52  
53  
54  
55  
56  
57  
58  
59  
60

For peer review only

## ARTICLE SUMMARY

### Article focus

- This review aims to identify the organisational factors that affect the implementation of hospital-wide interventions in acute hospitals, and how these organisational factors and hospital-wide interventions influence patient outcomes.

### Key messages

- Silos, or vertical structures within hospitals such as wards, units, and departments, are well developed in acute care hospitals, but the system may fail at the intersection between silos for patients with complications of the original illness, which are outside the expertise of the admitting clinician.
- To bridge these intersections and thereby reduce the potential preventable adverse events for an increasingly aged and ill hospital population with comorbidities, organisation-wide patient safety interventions are becoming a major focus of health care delivery.
- Little is known about the cultural and organisational determinants of hospital-wide interventions and their effects on patient outcomes.

### Strengths and limitations of this project

- This study aims to increase our knowledge of organisational culture, which we believe is an important element in the success or failure of the implementation of hospital-wide interventions.
- We will investigate how the adoption of a system-wide intervention can affect patient outcomes.

- We will be including observational studies as well as controlled before and after studies in the systematic review, as it is likely they will provide valuable information.
- We include only English language studies.
- Risk of bias will be assessed using standard Cochrane criteria.

For peer review only

## INTRODUCTION

Despite the remarkable advances in healthcare delivery and considerable changes in hospital patient populations and expectations associated with modern medicine, the fundamental organisation of hospitals has changed little into the twenty first century. The system is constructed around the admitting doctor and patient relationship.<sup>1</sup> In acute hospitals, wards are able to manage the day-to-day aspects of a patient's condition, but the system can fail when the patient's condition deteriorates and the admitting doctor no longer has the skills or knowledge to neither recognise nor manage the deteriorating patient.<sup>1-3</sup> One of the first organisation wide and patient centred systems, known as the Medical Emergency Team (MET) or Rapid Response System (RRS) has been implemented in many hospitals around the world to address this situation.<sup>2</sup> When the criteria that define an at-risk or deteriorating patient are met, a team of clinicians with appropriate skills urgently responds to the patient. However, because of the nature of hospitals, and depending on the existence of necessary infrastructure to provide the continuity of care,<sup>4 5</sup> the effectiveness of the few-implemented hospital-wide interventions, such as an RRS, varies significantly from one health organisation to another.<sup>6</sup> Ultimately, we are interested in determining why interventions such as MET are successful in some settings but not in others. By examining hospital-wide interventions in acute care systems (including non-MET interventions) via this systematic literature review, we hope to shed some light on the problem.

While there is keen interest in how to optimise and implement the system, little is known about the role of organisational culture<sup>7-10</sup> in the success and sustainability of the hospital-wide interventions, and how the culture could affect patient outcomes in acute hospitals. Patient safety interventions working at an organisational level that include participative principles, such as the involvement of workers in design and implementation, may provide the greatest hope of



1  
2  
3 improving patient safety.<sup>11-13</sup> We note the identification of limitations in the literature such as  
4 those identified by Kaplan et al. 2010,<sup>14</sup> including the lack of a practical conceptual model, the  
5 lack of clear definitions of contextual factors and the lack of well-specified measures. This  
6 protocol details the processes of a systematic literature review that aims to identify the  
7 organisational and cultural factors<sup>9 15</sup> affecting the adoption and success of hospital-wide  
8 interventions in acute hospitals, and to assess the effects of those factors on patient outcomes.  
9

## 17 METHODS AND ANALYSIS

### 20 Search Strategy

21 We will search MEDLINE, CINAHL, EMBASE, Web of Science, PsychInfo, Global Health,  
22 using Medical Subject Headings and keywords, from 1946, 1991, 1947, 1934, 1967, 1910,  
23 respectively to September 2012. The general search strategy is shown in Box 1 and the subject  
24 heading will be adjusted for each database. We will use multiple terms to identify culture and  
25 intervention. The search will be restricted to English language articles (access to translation  
26 services is not available for the review), however we note that a recent systematic review of  
27 empirical studies on the effect of English-language restriction on systematic reviews found "no  
28 evidence overall of a systematic bias from the use of language restrictions in systematic review-  
29 based meta-analyses in conventional medicine."<sup>16</sup> In addition to searching the specified  
30 databases, to check that the database searches have not missed any studies that may be relevant  
31 to our review we will hand search the journals, JAMA, BMJ, BMJ Quality and Safety, Lancet,  
32 New England Journal of Medicine and Implementation Science, separately for the last five years  
33 (from 2007-2012). The topic of hospital-wide interventions is broad and complex, and it is  
34 possible that relevant articles may be classified differently to the review search terms. The hand  
35 search will serve to check that our search criteria are broad enough, and that an extension of the  
36  
37  
38  
39  
40  
41  
42  
43  
44  
45  
46  
47  
48  
49  
50  
51  
52  
53  
54  
55  
56  
57  
58  
59  
60

1  
2  
3 search criteria is not required. These peer-reviewed journals were chosen as the most likely to  
4 publish studies that meet the inclusion criteria, in particular, validated patient outcomes. The  
5 ~~search will be restricted to English language articles (the authors do not have resources for~~  
6 ~~translation) and we will hand search the journals, JAMA, BMJ, BMJ Quality and Safety, Lancet,~~  
7 ~~New England Journal of Medicine and Implementation Science, separately for the last five years~~  
8 ~~(from 2007-2012). The peer reviewed journals were chosen as the most likely to publish studies~~  
9 ~~that meet inclusion criteria, in particular validated patient outcomes. Although PLOS Medicine~~  
10 ~~and BMJ Open are also likely to publish studies that meet our criteria, both are open access~~  
11 ~~online journals with all articles linked to PubMed at time of publication, therefore we expect that~~  
12 ~~the online search engines will capture relevant papers from these journals.~~ We will also hand  
13 search the reference lists of the relevant Cochrane systematic reviews. Two researchers will  
14 conduct the hand search; if disagreement about inclusion of a study occurs a third researcher will  
15 arbitrate.

### Box 1. General search strategy

1. Organisational culture OR organisational climate OR organisational context OR organisational characteristics OR workplace culture OR organisational goal OR organisational value
2. AND [(adopting organisation) OR (adherence to protocol) OR (organisational innovation) OR (diffusion of innovation) OR (intervention) OR (diffusion) OR (organisational change) OR (protocol change) OR (practice change) OR (structure change) OR (adoption) OR (leadership)]
3. AND (patient outcome)
4. AND [healthcare organisation OR hospital OR healthcare facility]

### Study Selection and exclusion criteria

Under the review's inclusion and exclusion criteria, research must focus on a hospital-wide intervention, i.e., mere implementation in the operation theatre, a few general units or ICU is not

1  
2  
3 sufficient. Other inclusion criteria include investigating the organisational factors that may affect  
4 the implementation. Studies should also provide patient outcome data before and after the  
5 hospital-wide intervention. The review will only include interventions in an acute care setting,  
6 i.e., rehabilitation centres, primary health cares, ambulatory services, and psychiatric facilities  
7 will be excluded. Other inclusion criteria include that the study report on empirical research, in  
8 peer reviewed, English language, scholarly journals, and that abstract and full text are available.  
9 The 'grey literature' will be excluded as it is unlikely to yield study designs that meet inclusion  
10 criteria.  
11  
12  
13  
14  
15  
16  
17  
18  
19  
20  
21

22  
23 We will not limit our search to randomised controlled trial studies, since we believe  
24 observational studies and controlled before and after studies -- with validated data about patient  
25 outcomes -- can provide useful information to identify the organisational and cultural  
26 determinants of hospital-wide interventions.  
27  
28  
29  
30  
31  
32

33  
34 References identified in the search will be reviewed for inclusion by two researchers. Studies  
35 will be excluded only after discussion between at least two reviewers, who will assess and agree  
36 on the inclusion and quality rating of the studies. The methodological quality of the reported  
37 research will be assessed in accordance with Cochrane Collaboration guidelines.<sup>17</sup> The quality of  
38 the reporting of the identified studies will be assessed using appropriate critical appraisal tools,  
39 such as CONSolidated Standards of Reporting Trials (CONSORT),<sup>18</sup> Strengthening the Reporting  
40 of Observational Studies in Epidemiology (STROBE)<sup>19</sup> or Preferred Reporting Items for  
41 Systematic Reviews and Meta-Analyses (PRISMA).<sup>20</sup> All papers excluded by consensus will be  
42 depicted in a document explaining reason for exclusion. Our review~~his process~~ will be conducted  
43 according to PRISMA guidelines<sup>20 21</sup> and literature selection will be presented in a PRISMA  
44 flow chart.<sup>20</sup> The selection criteria may limit the generalisability of study findings, however the  
45  
46  
47  
48  
49  
50  
51  
52  
53  
54  
55  
56  
57  
58  
59  
60

1  
2  
3 scope of the search is appropriate to identify the majority of articles published in the peer review  
4  
5 literature and meeting the study criteria.  
6  
7

### 8 9 **Participants**

10  
11 Participating hospitals may include any acute care facility, including metropolitan or rural, and  
12  
13 private or public hospitals.  
14  
15

### 16 17 **Type of interventions**

18  
19 As noted, we will only include interventions that are hospital-wide and are associated with  
20  
21 patient outcomes through validated data collected before and after implementation of the  
22  
23 intervention. Also, the organisational elements of the intervention should have been explained in  
24  
25 the study to make it qualified for our review.  
26  
27  
28

### 29 30 **Comparisons**

31  
32 Comparisons may include acute hospitals with similar nursing-patient ratio, size and region with  
33  
34 no intervention.  
35  
36  
37

### 38 39 **Types of outcome measures**

40  
41 Patient outcomes may include mortality rate, the rate of adverse events, patient satisfaction, and  
42  
43 infection rate.  
44  
45  
46

### 47 48 **Assessment of risk of bias**

1  
2  
3 Two reviewers will independently assess risk of bias in eligible studies as outlined in the  
4  
5 Cochrane Handbook for Systematic Reviews:<sup>17</sup> selective outcome reporting, and blinding of the  
6  
7  
8 research personnel to data collection and analysis. For any non-randomised trials included in the  
9  
10 review, the authors will assess any selection bias that may lead to confounding of the outcome.  
11  
12 Disagreement regarding assessment of risk of bias will be resolved through discussion between  
13  
14 two reviewers. If consensus is not reached, a third reviewer will be consulted.  
15  
16  
17

### 18 **Data Collection and Analysis**

19  
20 Using a standard form created for the review, one author will extract summary descriptive data  
21  
22 from these studies. The same author will compile a tabular presentation the study participants  
23  
24 and setting, objective, design and method, type of hospital-wide intervention,  
25  
26 organisational/cultural factors, patient/process outcomes, and findings. The second author will  
27  
28 independently review this documentation for accuracy and completeness.  
29  
30  
31  
32  
33

### 34 **Strategy for data synthesis**

35  
36 If suitable data are available, a meta-analysis will be completed; however it is likely that  
37  
38 included studies will be heterogeneous in nature. Where trial data cannot be combined, two of  
39  
40 the authors will conduct a narrative synthesis of the findings in accordance with the review  
41  
42 objectives. We will discuss characteristics of the studies and stratify the results according to the  
43  
44 type of hospital-wide interventions, organisational factors associated with them, and outcomes  
45  
46 measured. ~~We anticipate that we will not be able to use a quality assessment tool to formally~~  
47  
48 ~~assess the quality of the studies due to their heterogeneous nature.~~<sup>202117</sup>  
49  
50  
51  
52

### 53 **Limitations**

1  
2  
3 The review findings will be limited by the number and quality of studies identified by the search  
4 strategy. A potential limitation is in selection of the search terms. The concept of a ‘hospital-  
5 wide intervention’ is subject to classification, and it is possible that studies could be published  
6 that would meet our inclusion criteria, but are not identified by the search engines due to use of  
7 alternate terms or categorisation. We have attempted to ameliorate this with a hand search over  
8 the last five years of six prominent general medical journals that we believe are likely to publish  
9 studies relevant to our review. The hand searching provides an additional check on the reliability  
10 of the search strategy of the electronic databases and will serve to check that an extension of the  
11 search criteria is not required. By restricting the search to English language articles we are also  
12 potentially eliminating relevant studies from inclusion in our review. In particular, limiting the  
13 hand search to restricted access general medicine publications that are likely to publish studies  
14 with validated patient outcomes places reliance on the search engines to deliver relevant papers  
15 from open access online publications such as BMJ Open and PLOS Medicine.  
16  
17  
18  
19  
20  
21  
22  
23  
24  
25  
26  
27  
28  
29  
30  
31  
32  
33  
34  
35

## 36 ETHICS AND DISSEMINATION

37  
38  
39 Ethics is not required given the protocol is a systematic literature review. The findings of this  
40 review will be disseminated through mechanisms including peer-reviewed publications and  
41 conference presentations. The PRISMA checklist<sup>20</sup> will be used for writing the final review.  
42  
43  
44  
45  
46

47 **ACKNOWLEDGEMENTS:** We acknowledge Dr. Isla Hains from the Centre for Health  
48 Systems and Safety Research in the Australian Institute of Health Innovation who provided  
49 guidance regarding the search strategy.  
50  
51  
52  
53  
54

55 **COMPETING INTERESTS:** The authors have no conflict of interest to declare.  
56  
57  
58  
59  
60

1  
2  
3  
4  
5  
6  
7  
8  
9  
10  
11  
12  
13  
14  
15  
16  
17  
18  
19  
20  
21  
22  
23  
24  
25  
26  
27  
28  
29  
30  
31  
32  
33  
34  
35  
36  
37  
38  
39  
40  
41  
42  
43  
44  
45  
46  
47  
48  
49  
50  
51  
52  
53  
54  
55  
56  
57  
58  
59  
60

**AUTHORS' CONTRIBUTIONS:** All authors contributed to the design, drafting and revision of the paper, and approved the final version to be published.

For peer review only

## REFERENCES

1. Hillman K, Chen J, Young L. The evolution of the health care system. In: DeVita MA, Hillman K, Bellomo R, editors. *Medical Emergency Teams*: Springer New York, 2006:18-23.
2. Hillman K, Chen J, Aneman A. Continuum of hospital care: the role of intensive care. *Current Opinion in Critical Care* 2010;16(5):505-09.
3. Hillman KM. Restructuring hospital services. *Medical Journal of Australia* 1998;169(5):239-39.
4. Hillman K, Parr M, Flabouris A, Bishop G, Stewart A. Redefining in-hospital resuscitation: the concept of the medical emergency team. *Resuscitation* 2001;48(2):105-10.
5. Sakai T, DeVita MA. Rapid response system. *Journal of Anesthesia* 2009;23(3):403-08.
6. Hillman K, Chen J, Cretikos M, Bellomo R, Brown D, Doig G, et al. Introduction of the medical emergency team (MET) system: a cluster-randomised controlled trial. *Lancet* 2005;365(9477):2091-7.
7. Braithwaite J. A lasting legacy from Tony Blair? NHS culture change. *Journal of the Royal Society of Medicine* 2011;104(2):87-89.
8. Braithwaite J, Hyde P, Pope C. *Culture and climate in health care organisations*. Basingstoke, UK: Palgrave Macmillan, 2009.
9. Mannion R, Davies H, Harrison S, Frederick K, Jacobs R, Walshe K. Changing management cultures in the English National Health Service. In: Braithwaite J, Hyde P, Pope C, editors. *Culture and climate in health care organisations*. Basingstoke, UK: Palgrave Macmillan, 2009:19-30.
10. Mannion R, Davies H, Harrison S, Konteh F, Greener I, McDonald R. Quantitative explorations of culture and performance relationship: changing organisational cultures and hospital performance in the NHS. Birmingham, UK: National Institute for Health Research Service Delivery and Organisation Programme, 2010:42-72.
11. Braithwaite J, Coiera E. Beyond patient safety flatland. *Journal of the Royal Society of Medicine* 2010;103(6):219-25.
12. Grayson ML, Russo PL, Cruickshank M, Bear JL, Gee CA, Hughes CF, et al. Outcomes from the first 2 years of the Australian National Hand Hygiene Initiative. *Medical Journal of Australia* 2011;195(10):615-19.
13. Larson EL, Early E, Cloonan P, Sugrue S, Parides M. An organizational climate intervention associated with increased handwashing and decreased nosocomial infections. *Behavioral Medicine* 2000;26(1):14-22.



- 1  
2  
3 14. Kaplan HC, Brady PW, Dritz MC, Hooper DK, Linam W, Froehle CM, et al. The influence  
4 of context on quality improvement success in health care: a systematic review of the literature.  
5 *Milbank Quarterly* 2010;88(4):500-59.  
6
- 7  
8 15. Cameron K, Freeman S. Culture, congruence, strength and type: relationship to effectiveness  
9 research in organizational change and development. *Research in organizational change and*  
10 *development* 1991;5:23-58.  
11
- 12  
13 16. Morrison A, Polisena J, Husereau D, Moulton K, Clark M, Fiander M, et al. The effect of  
14 English-language restriction on systematic review-based meta-analyses: a systematic review of  
15 empirical studies *International Journal of Technology Assessment in Health Care*  
16 2012;28(02):138-44.  
17
- 18  
19 17. Higgins JPT, Green S, Collaboration C. *Cochrane handbook for systematic reviews of*  
20 *interventions*: Wiley Online Library, 2008.  
21
- 22  
23 18. Schulz KF, Altman DG, Moher D. CONSORT 2010 statement: updated guidelines for  
24 reporting parallel group randomised trials. *BMC Medicine* 2010;8(1):18.  
25
- 26  
27 19. Von Elm E, Altman DG, Egger M, Pocock SJ, Gøtzsche PC, Vandenbroucke JP. The  
28 Strengthening the Reporting of Observational Studies in Epidemiology (STROBE) statement:  
29 guidelines for reporting observational studies. *Preventive Medicine* 2007;45(4):247-51.  
30
- 31  
32 20. Liberati A, Altman DG, Tetzlaff J, Mulrow C, Gøtzsche PC, Ioannidis JPA, et al. Research  
33 Methods & Reporting: The PRISMA statement for reporting systematic reviews and meta-  
34 analyses of studies that evaluate healthcare interventions: explanation and elaboration. *British*  
35 *Medical Journal* 2009;339:339.  
36
- 37  
38 21. Moher D, Liberati A, Tetzlaff J, Altman DG. Preferred reporting items for systematic  
39 reviews and meta-analyses: the PRISMA statement. *PLoS Medicine* 2009;6(7):e1000097.  
40  
41  
42  
43  
44  
45  
46  
47  
48  
49  
50  
51  
52  
53  
54  
55  
56  
57  
58  
59  
60
